# Supplementary material for: New metathesis catalyst bearing chromanyl moieties at the N-heterocyclic carbene ligand
Source: publisher site journal article supplement (doi:10.3762/bjoc.11.300), 2015-12-30
Supplement: Additional file 1 [file 1860-5397-11-300-S1.pdf]

**Supporting Information**

**for**

**New metathesis catalyst bearing chromanyl moieties  
at the N-heterocyclic carbene ligand**

Agnieszka Hryniewicka\*, Szymon Suchodolski, Agnieszka Wojtkielewicz, Jacek W. Morzycki and Stanisław Witkowski\*

Address: University of Białystok, Institute of Chemistry, Ciołkowskiego Street 1K, 15-245 Białystok; Poland

Email: Agnieszka Hryniewicka - aga\_h@uwb.edu.pl; Stanisław Witkowski - wit@uwb.edu.pl

\*Corresponding author

**Experimental procedures of the testing of the new catalyst and copies of  $^1\text{H}$  and  $^{13}\text{C}$  NMR spectra  
of new compounds**

## Table of contents

|                                                                                                                                                        |     |
|--------------------------------------------------------------------------------------------------------------------------------------------------------|-----|
| <b>Testing of the new catalyst 9</b> .....                                                                                                             | S3  |
| <b>Copies of NMR spectra of new compounds</b>                                                                                                          |     |
| <sup>1</sup> H NMR spectrum of 6-nitro-2,2,5,7,8-pentamethylchromane ( <b>11</b> ).....                                                                | S6  |
| <sup>13</sup> C NMR spectrum of 6-nitro-2,2,5,7,8-pentamethylchromane ( <b>11</b> ).....                                                               | S7  |
| <sup>1</sup> H NMR spectrum of 2,2,5,7,8-pentamethylchromanyl-6-amine ( <b>12</b> ).....                                                               | S8  |
| <sup>13</sup> C NMR spectrum of 2,2,5,7,8-pentamethylchromanyl-6-amine ( <b>12</b> ).....                                                              | S9  |
| <sup>1</sup> H NMR spectrum of <i>N,N</i> -bis(2,2,5,7,8-pentamethylchroman-6-yl)ethane-1,2-diamine ( <b>13</b> ).....                                 | S10 |
| <sup>13</sup> C NMR spectrum of <i>N,N</i> -bis(2,2,5,7,8-pentamethylchroman-6-yl)ethane-1,2-diamine ( <b>13</b> ).....                                | S11 |
| <sup>1</sup> H NMR spectrum of 1,3- <i>bis</i> (2,2,5,7,8-pentamethylchroman-6-yl)-4,5-dihydro-1 <i>H</i> -imidazol-3-ium chloride ( <b>14</b> ).....  | S12 |
| <sup>13</sup> C NMR spectrum of 1,3- <i>bis</i> (2,2,5,7,8-pentamethylchroman-6-yl)-4,5-dihydro-1 <i>H</i> -imidazol-3-ium chloride ( <b>14</b> )..... | S13 |
| HSQC spectrum of 1,3- <i>bis</i> (2,2,5,7,8-pentamethylchroman-6-yl)-4,5-dihydro-1 <i>H</i> -imidazol-3-ium chloride ( <b>14</b> ).....                | S14 |
| <sup>1</sup> H NMR spectrum of the catalyst <b>9</b> .....                                                                                             | S15 |
| <sup>13</sup> C NMR spectrum of the catalyst <b>9</b> .....                                                                                            | S16 |
| HSQC spectrum of the catalyst <b>9</b> .....                                                                                                           | S17 |
| HSQC spectrum of the catalyst <b>9</b> (limited range).....                                                                                            | S18 |
| <sup>1</sup> H NMR spectrum of the catalyst <b>9</b> ( <i>T</i> = 323 K; limited range).....                                                           | S19 |
| <sup>13</sup> C NMR spectrum of the catalyst <b>9</b> ( <i>T</i> = 323 K; limited range).....                                                          | S20 |
| <sup>13</sup> C DEPT spectrum of the catalyst <b>9</b> ( <i>T</i> = 323 K; limited range).....                                                         | S21 |
| <b>References</b> .....                                                                                                                                | S22 |

## Testing of the catalyst 9

### *General CM procedure for allylbenzene and ethyl acrylate (Table 1, entries 1, 2)*

- a) To a mixture of allylbenzene (0.2 mmol) and ethyl acrylate (0.4 mmol) in CH<sub>2</sub>Cl<sub>2</sub> (1.5 mL) a solution of catalyst **1**, **2**, **3** or **9** (2.5 mol %) in CH<sub>2</sub>Cl<sub>2</sub> (0.5 mL) was added. The resulting mixture was stirred at 0 °C under argon atmosphere and controlled by <sup>1</sup>H NMR after 1, 2 and 3 hours.
- b) To a mixture of allylbenzene (0.2 mmol) and ethyl acrylate (0.4 mmol) in CH<sub>2</sub>Cl<sub>2</sub> (1.5 mL) a solution of catalyst **3** or **9** (1 mol %) in CH<sub>2</sub>Cl<sub>2</sub> (0.5 mL) was added. The resulting mixture was stirred at 0 °C under argon atmosphere and analysed by <sup>1</sup>H NMR after 3 hours.

The spectral data obtained for CM product are consistent with those given in the literature [1].

Yield was determined by comparison of integration of CM product proton signal (dd, 2H) at 3.53 ppm or (dt, 1H) at 5.83 ppm and SM product of allylbenzene ((*E*)-1,4-diphenylbut-2-ene) proton signal (m, 2H) at 5.67–5.71 ppm and/or substrate (allylbenzene, since acrylate was used in excess) proton signal (m, 1H) at 5.81–6.17 ppm. Amount of protons corresponding to these signals was taken into account in the calculations.

### *General CM procedure for hex-5-enyl acetate and methyl vinyl ketone (Table 1, entry 3)*

To a mixture of the hex-5-enyl acetate (0.2 mmol) and methyl vinyl ketone (0.4 mmol) in CH<sub>2</sub>Cl<sub>2</sub> (1.5 mL) a solution of catalyst **1**, **2**, **3** or **9** (1 mol %) in CH<sub>2</sub>Cl<sub>2</sub> (0.5 mL) was added. The resulting mixture was stirred at 0 °C under argon atmosphere and controlled by <sup>1</sup>H NMR after 3 hours. The spectral data obtained for CM product are consistent with those given in the literature [2].

Yield was determined by comparison of integration of CM product proton signal (dt, 1H) at 6.07 ppm and SM product of hex-5-enyl acetate ((*E*)-dec-5-ene-1,10-diol diacetate) proton signal (m, 2H) at 5.40–5.42 ppm and/or substrate (hex-5-enyl acetate, since ketone was used in excess) proton signal (m, 1H) at 5.74–5.84 ppm. Amount of protons corresponding to these signals was taken into account in the calculations.

### *General CM procedure for hex-5-enyl acetate and acrylonitrile (Table 1, entry 4)*

To a mixture of the hex-5-enyl acetate (0.2 mmol) and acrylonitrile (0.4 mmol) in CH<sub>2</sub>Cl<sub>2</sub> (1.5 mL) a solution of catalyst **1**, **2**, **3** or **9** (1 mol %) in CH<sub>2</sub>Cl<sub>2</sub> (0.5 mL) was added. The resulting mixture was stirred at 0 °C for 1 h under argon atmosphere and analysed by <sup>1</sup>H NMR. The spectral data obtained for CM product are consistent with those given in the literature [3].

Yield was determined by comparison of integration of CM product proton signal (d, 1H) at 5.35 ppm and SM product of hex-5-enyl acetate ((*E*)-dec-5-ene-1,10-diol diacetate) proton signal (m, 2H) at 5.40–5.42 ppm and/or substrate (hex-5-enyl acetate, since nitrile was used in excess) proton signal (m, 1H) at 5.74–5.84 ppm. Amount of protons corresponding to these signals was taken into account in the calculations.

### *General CM procedure for selected alkenes with (Z)-but-2-ene-1,4-diol diacetate (Table 2, entries 1–3)*

To a mixture of the alkene (0.2 mmol) and (*Z*)-but-2-ene-1,4-diol diacetate (0.4 mmol) in CH<sub>2</sub>Cl<sub>2</sub> (1.5 mL) a solution of catalyst **1**, **2** or **9** (2.5 mol %) in CH<sub>2</sub>Cl<sub>2</sub> (0.5 mL) was added. The resulting mixture was stirred at 20 °C for 3 h under argon atmosphere. The crude product was

purified by FC (hexane – ethyl acetate v/v 50:1) and analysed by  $^1\text{H}$  NMR. The spectral data obtained for CM products are consistent with those given in the literature [4].

*General CM procedure for allyloxybenzene and hex-5-enyl acetate (Table 2, entry 4)*

To a mixture of the alkenes (0.2 mmol, both) in  $\text{CH}_2\text{Cl}_2$  (1.5 mL) a solution of catalyst **1**, **2** or **9** (2.5 mol %) in  $\text{CH}_2\text{Cl}_2$  (0.5 mL) was added. The resulting mixture was stirred at 20 °C for 3 h under argon atmosphere. The crude product was purified by FC (hexane – ethyl acetate v/v 20:1) and analysed by  $^1\text{H}$  NMR. The spectral data obtained for CM product are consistent with those given in the literature [4].

*General RCM procedure for diethyl diallylmalonate (Table 3, entry 1)*

To a solution of the alkene (0.2 mmol) in  $\text{CH}_2\text{Cl}_2$  (1.5 mL) a solution of catalyst **1**, **2** or **9** (1 mol %) in  $\text{CH}_2\text{Cl}_2$  (0.5 mL) was added. The resulting mixture was stirred at room temperature for 60 min under argon atmosphere. The crude product was analysed by  $^1\text{H}$  NMR. The spectral data obtained for RCM product are consistent with those given in the literature [5].

*General RCM procedure for diethyl allylmethylmalonate (Table 3, entry 2)*

To a solution of the alkene (0.2 mmol) in  $\text{CH}_2\text{Cl}_2$  (1.5 mL) a solution of catalyst **1**, **2** or **9** (1 mol %) in  $\text{CH}_2\text{Cl}_2$  (0.5 mL) was added. The resulting mixture was stirred at room temperature for 60 min under argon atmosphere. The crude product was analysed by  $^1\text{H}$  NMR. The spectral data obtained for RCM product are consistent with those given in the literature [5].

*General RCM procedure for diethyl dimethylmalonate (Table 3, entry 3)*

To a solution of alkene (0.2 mmol) in toluene (2 mL) a solution of catalyst **1**, **2** or **9** (5 mol %) in toluene (1 mL) was added. The resulting mixture was stirred at 80 °C for 16 h under argon atmosphere. The crude product was analysed by  $^1\text{H}$  NMR. The spectral data obtained for RCM product are consistent with those given in the literature [5].

*General CM procedure for diene and alkene (Table 4, entries 1–4)*

To the solution of ethyl (2*E*,4*E/Z*)-3-methylhexa-2,4-dienoate or (2*E*,4*E*)-hexa-2,4-dienoate (0.36 mmol) and a catalyst **1**, **2** or **9** (10 mol %) in dry  $\text{CH}_2\text{Cl}_2$  or toluene (0.5 mL) the solution of alkene (0.12 mmol) in dry DCM or toluene (0.5 mL) was added dropwise. The reaction mixture was stirred at 45 °C under argon atmosphere for 16 hours. Then the mixture was concentrated in vacuo and purified directly by silica gel chromatography using hexane/ethyl acetate as eluent. The diastereomeric ratio was determined by GC/MS or NMR analysis. The spectral data obtained for compounds: ethyl (2*E*,4*E*)-9-acetoxy-3-methylnona-2,4-dienoate [6] (entry 1, product A), ethyl (2*E*,4*E*)-3-methyl-5-phenylpenta-2,4-dienoate [7] (entry 2, product A), ethyl (2*E*,4*E*)-3-methyl-6-oxohepta-2,4-dienoate [8] (entry 3, product A), ethyl (2*E*,4*E*)-9-acetoxynona-2,4-dienoate [9] (entry 4, product A) and ethyl 7-acetoxyhept-2-enoate [10] (entry 4, product B) are consistent with those given in the literature.

In case of reaction between (2*E*,4*E*)-hexa-2,4-dienoate and hex-5-enyl acetate (entry 4) yield calculated from  $^1\text{H}$  NMR spectrum of isolated mixture of inseparable products **A** and **B** by integration of product A proton signal (dd) at 7.26 ppm and product B proton signal (dt) at 6.95 ppm.

*General CM procedure for polyene and diene (Scheme 4)*

To the solution of a polyene ( $2.44 \times 10^{-2}$  mmol) and a catalyst **1**, **2** or **9** (15 mol %) in dry toluene (0.3 mL) ethyl (2*E*,4*Z/E*)-3-methylhexa-2,4-dienoate ( $9.76 \times 10^{-2}$  mmol) was added dropwise. The reaction mixture was stirred at room temperature for 96 hours under argon atmosphere. Then the mixture was analysed by HPLC and purified by semipreparative HPLC. The spectral data obtained for CM products: ethyl retinoate and ethyl 12'-apo- $\beta$ -caroten-12'-oate are consistent with those given in the literature [11].

## Copies of NMR spectra of new compounds

<sup>1</sup>H NMR spectrum of 6-nitro-2,2,5,7,8-pentamethylchromane (11)

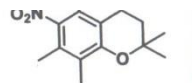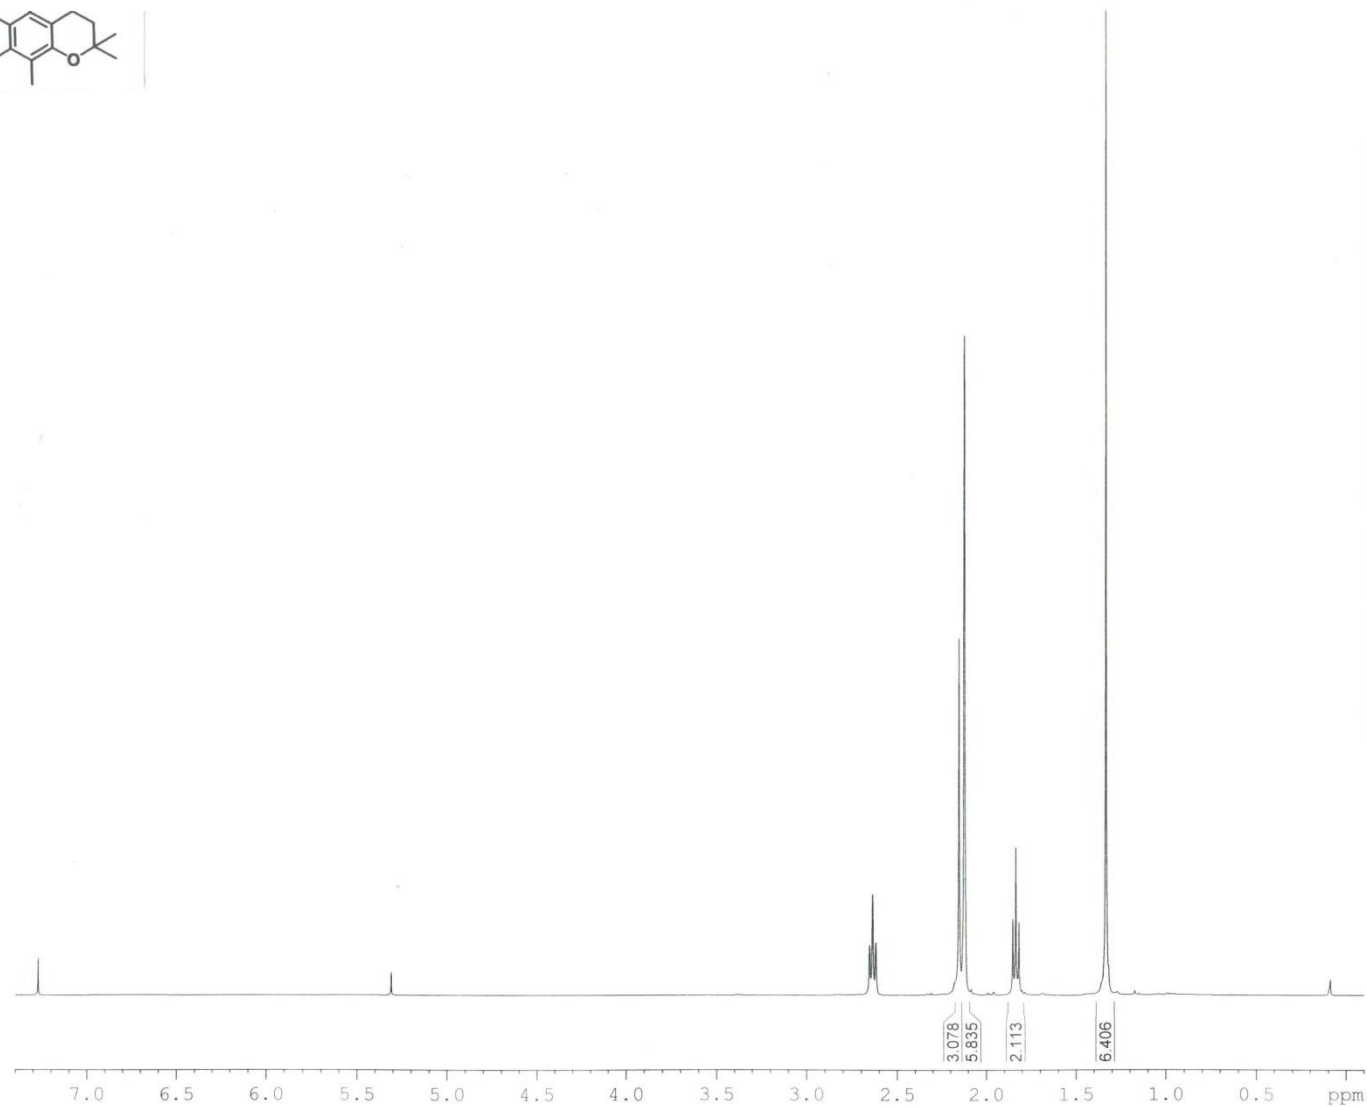

```
Current Data Parameters
NAME      SzS R16
EXPNO     1
PROCNO    1

F2 - Acquisition Parameters
Date_     20140127
Time      17.41
INSTRUM   spect
PROBHD    5 mm PABBO BB-
PULPROG   zg30
TD        65536
SOLVENT   CDCl3
NS        64
DS        0
SWH       8223.685 Hz
FIDRES    0.125483 Hz
AQ        3.9846387 sec
RG        203
DW        60.800 usec
DE        8.00 usec
TE        673.2 K
D1        1.00000000 sec
TD0       1

===== CHANNEL f1 =====
NUC1      1H
P1        11.15 usec
PL1       -3.00 dB
SFO1      400.1524711 MHz

F2 - Processing parameters
SI        32768
SF        400.1500000 MHz
WDW       GM
SSB       0
LB        -0.20 Hz
GB        0.2
PC        1.00
```

<sup>13</sup>C NMR spectrum of 6-nitro-2,2,5,7,8-pentamethylchromane (11)

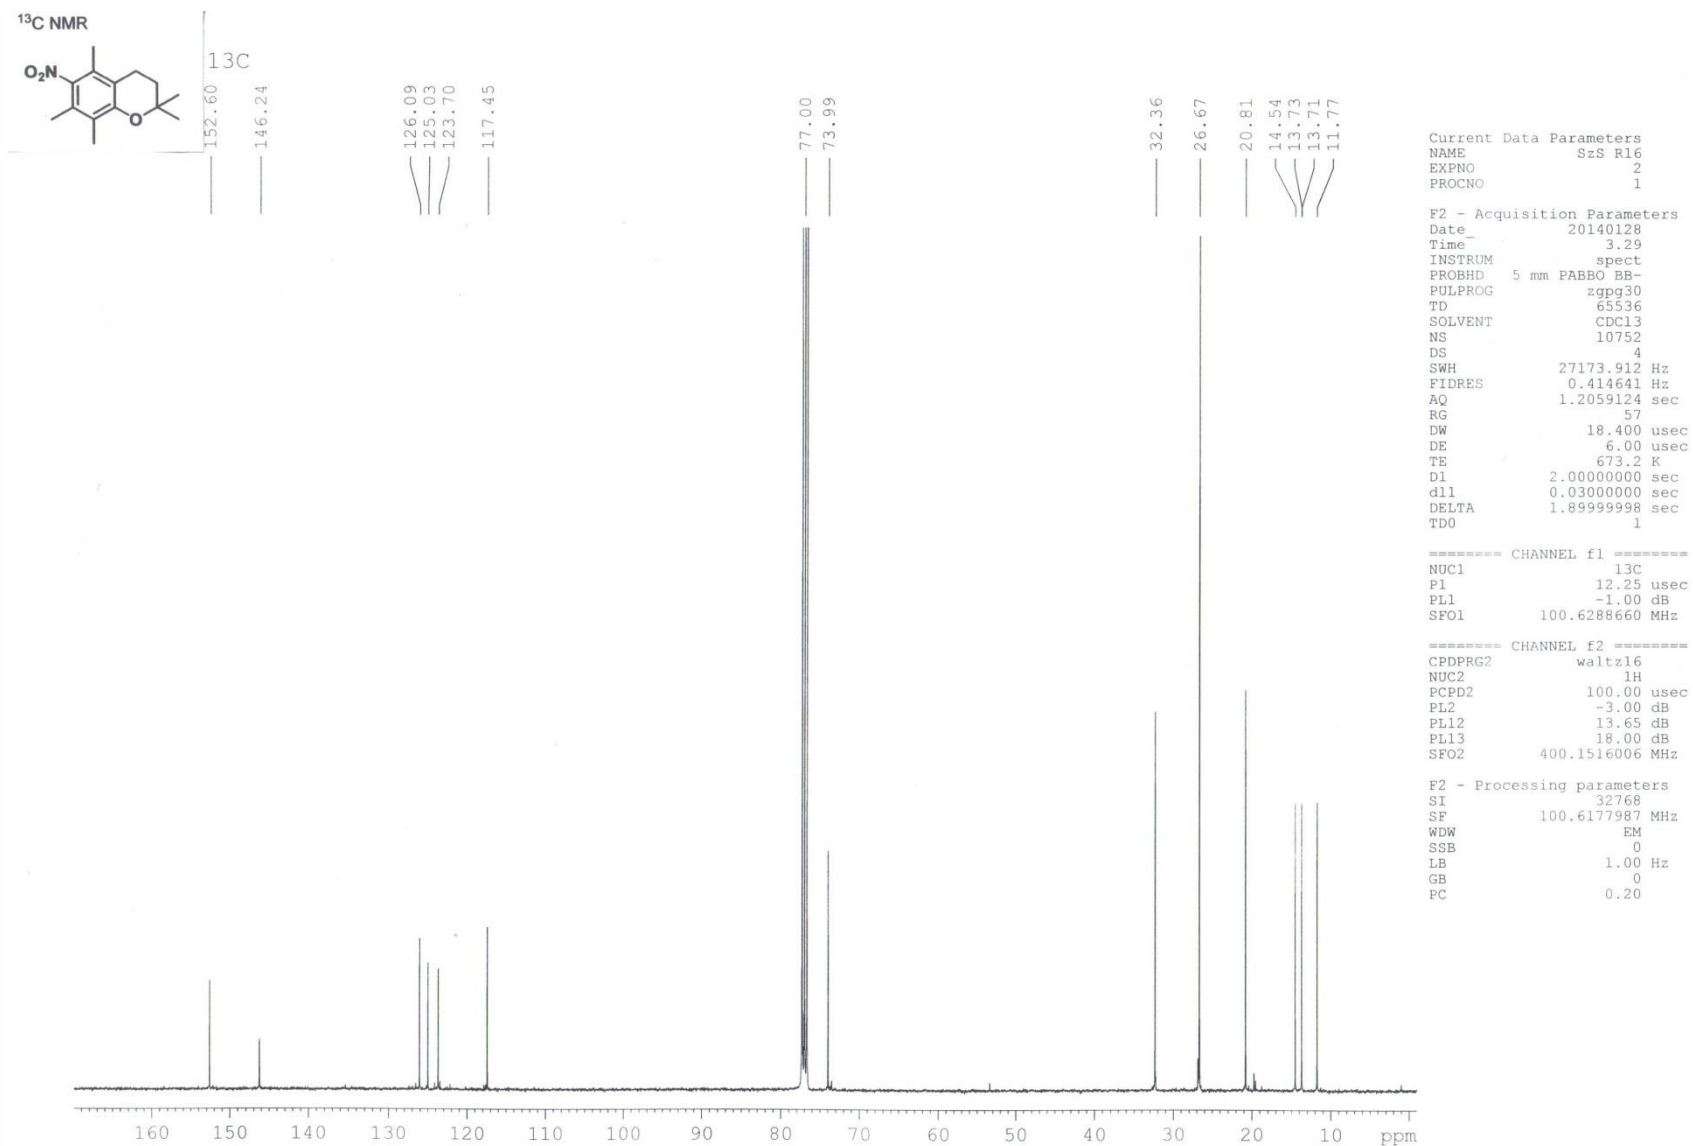

<sup>1</sup>H NMR spectrum of 2,2,5,7,8-pentamethylchromanyl-6-amine (**12**)

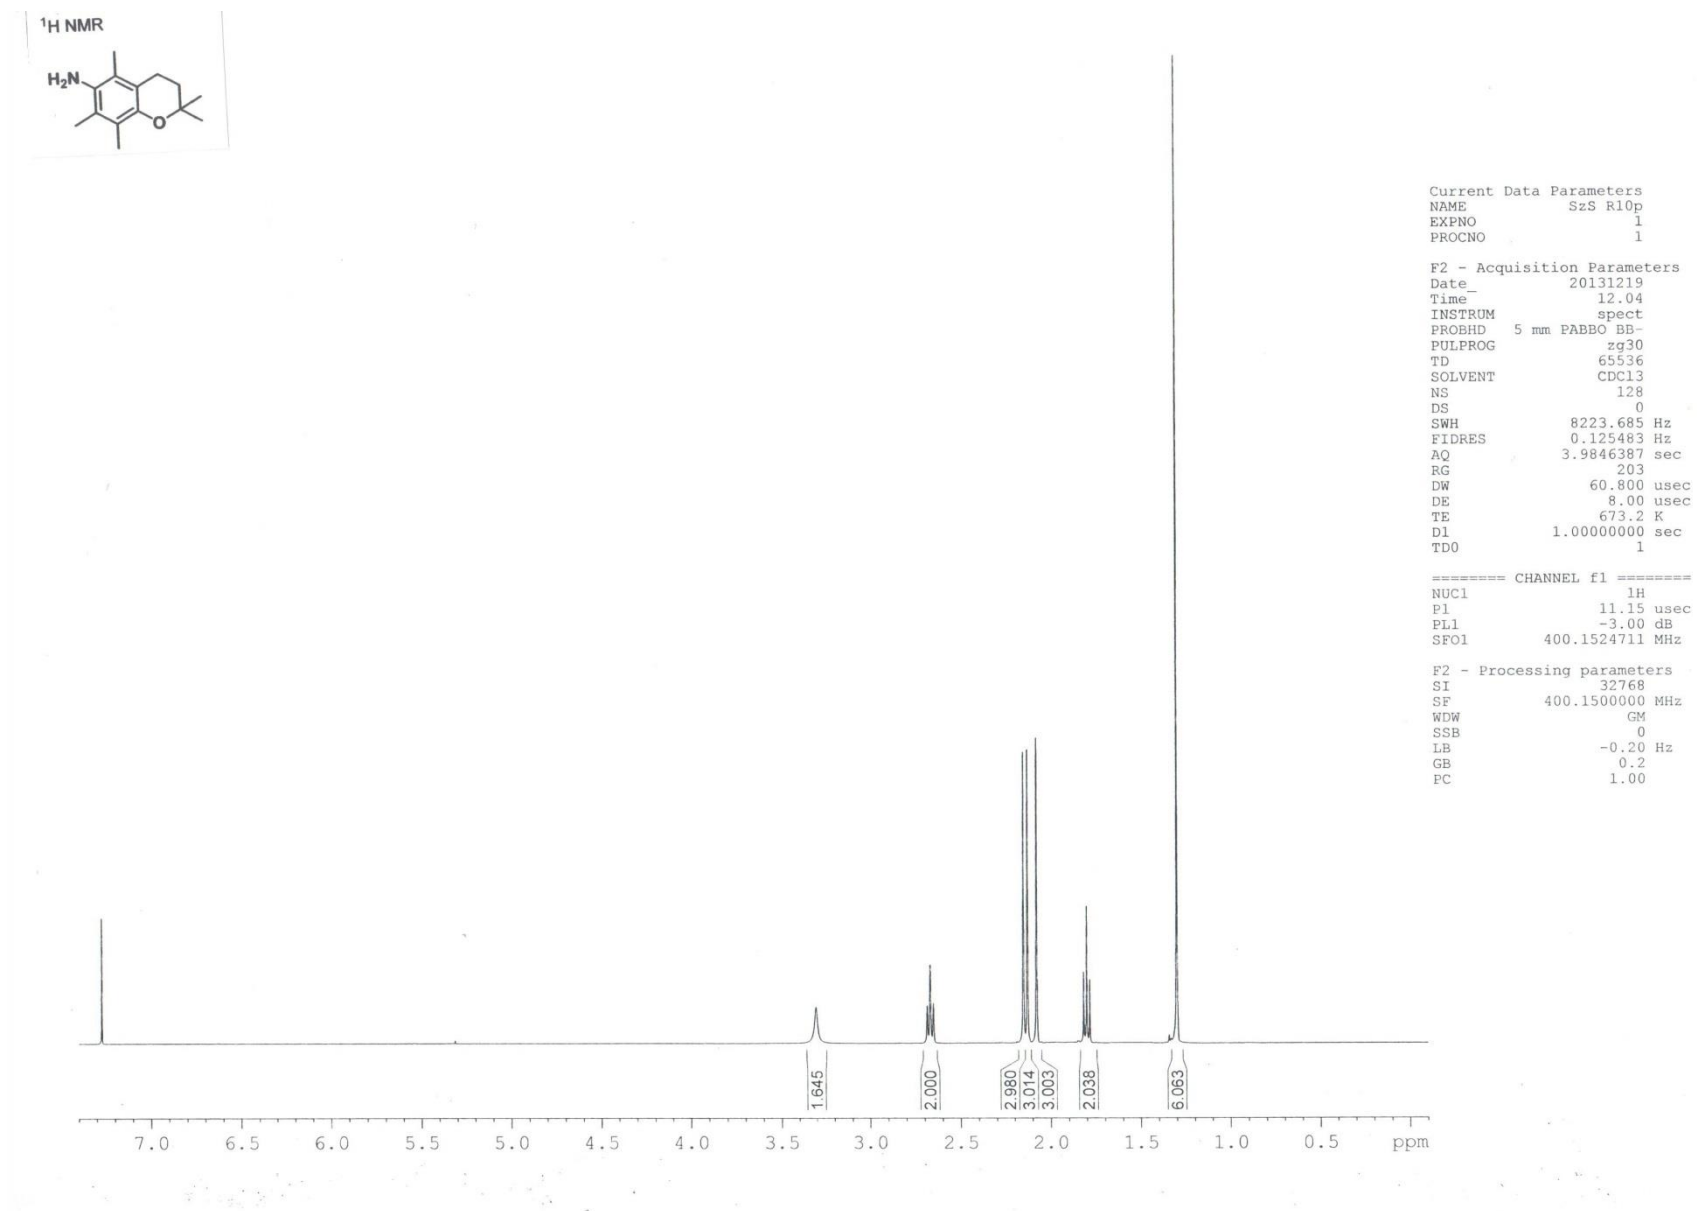



<sup>13</sup>C NMR spectrum of 2,2,5,7,8-pentamethylchromanyl-6-amine (**12**)

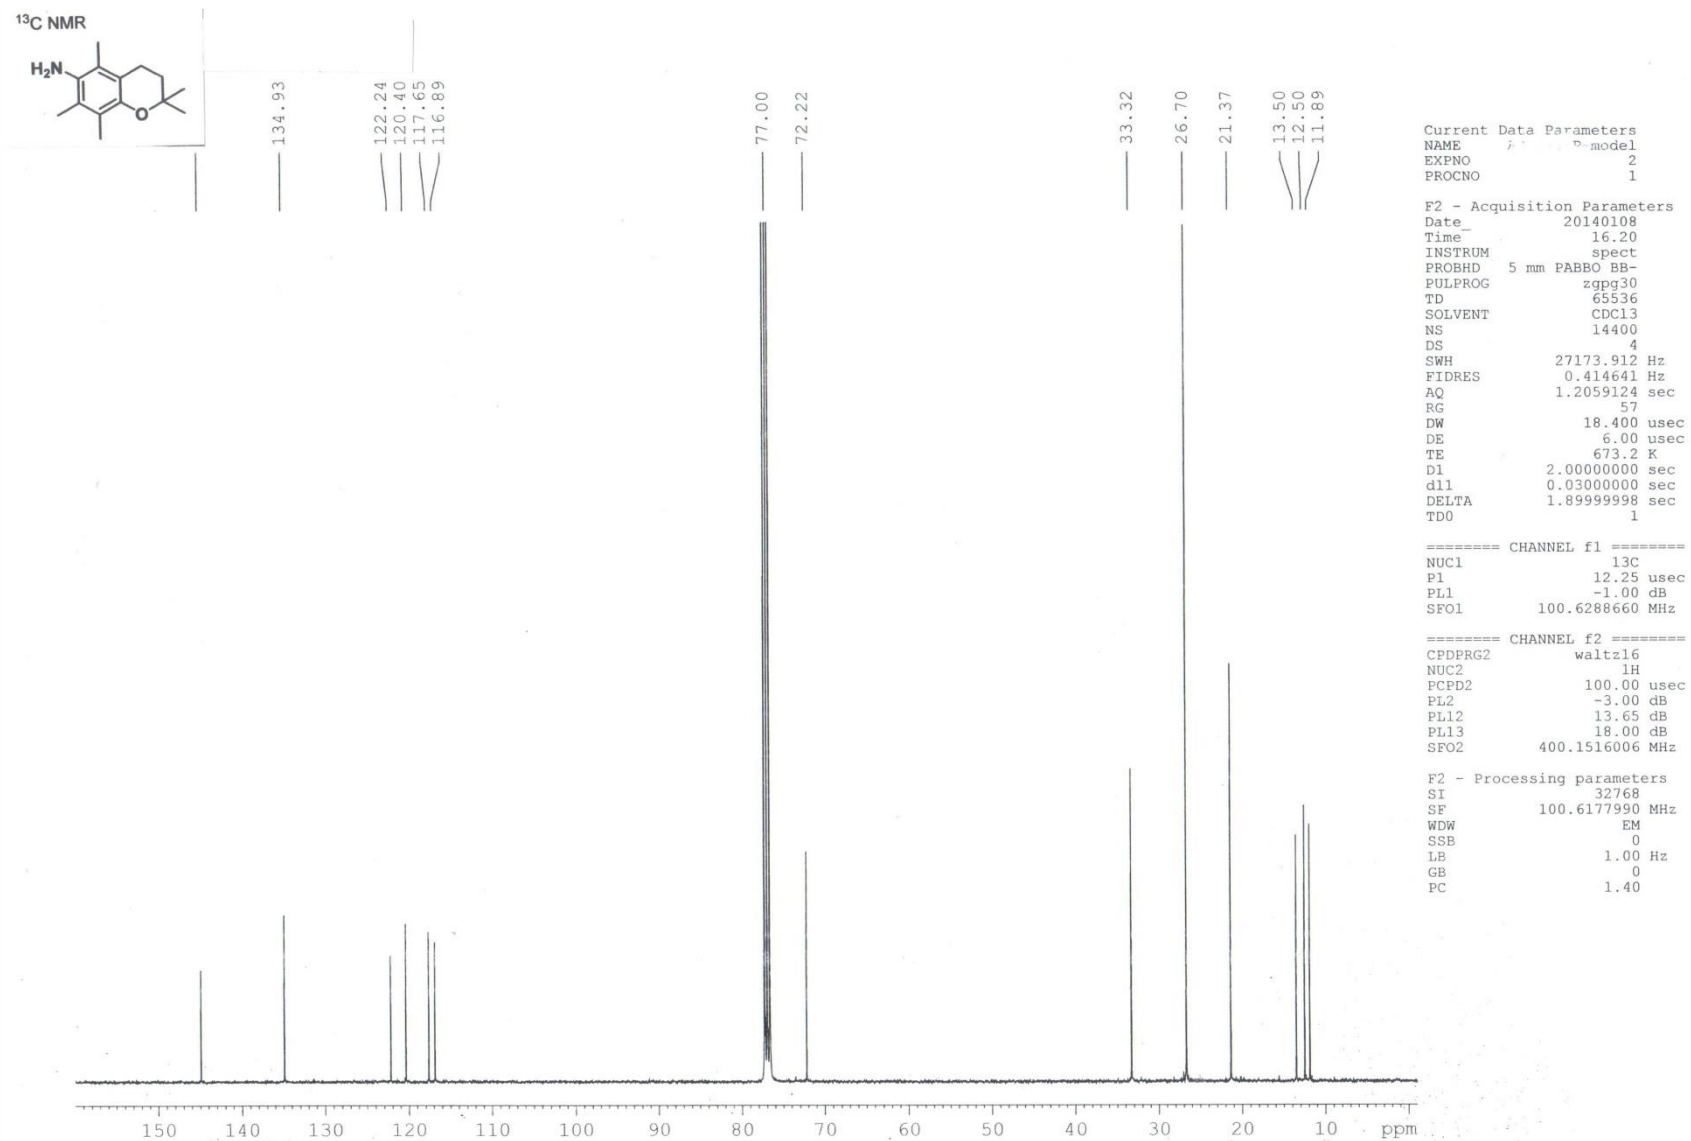

<sup>1</sup>H NMR spectrum of *N,N*-bis(2,2,5,7,8-pentamethylchroman-6-yl)ethane-1,2-diamine (**13**)

<sup>1</sup>H NMR

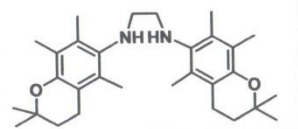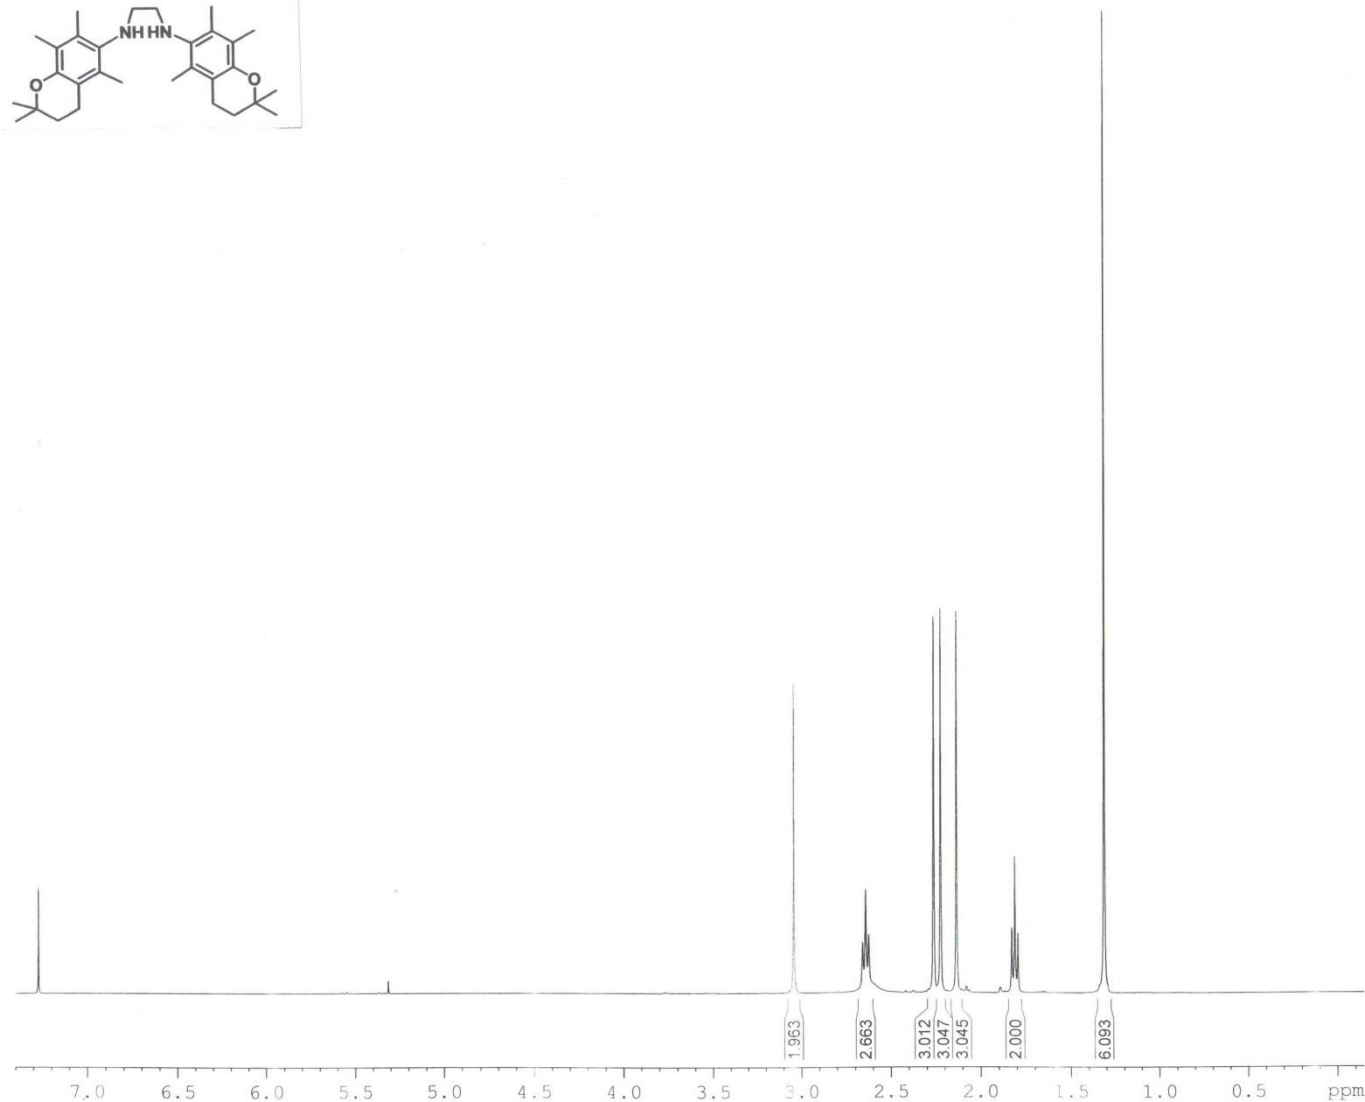

```

Current Data Parameters
NAME      SzS R19c
EXPNO     1
PROCNO    1

F2 - Acquisition Parameters
Date_     20140214
Time      14.39
INSTRUM   spect
PROBHD    5 mm PABBO BB-
PULPROG   zg30
TD        65536
SOLVENT   CDCl3
NS        128
DS        0
SWH       8223.685 Hz
FIDRES    0.125483 Hz
AQ        3.9846387 sec
RG        203
DW        60.800 usec
DE        8.00 usec
TE        298.0 K
D1        1.00000000 sec
TD0       1

===== CHANNEL f1 =====
NUC1      1H
P1        11.15 usec
PL1       -3.00 dB
SFO1      400.1524711 MHz

F2 - Processing parameters
SI        32768
SF        400.1500000 MHz
WDW       GM
SSB       0
LB        -0.20 Hz
GB        0.2
PC        1.00
    
```

$^{13}\text{C}$  NMR spectrum of *N,N*-bis(2,2,5,7,8-pentamethylchroman-6-yl)ethane-1,2-diamine (**13**)

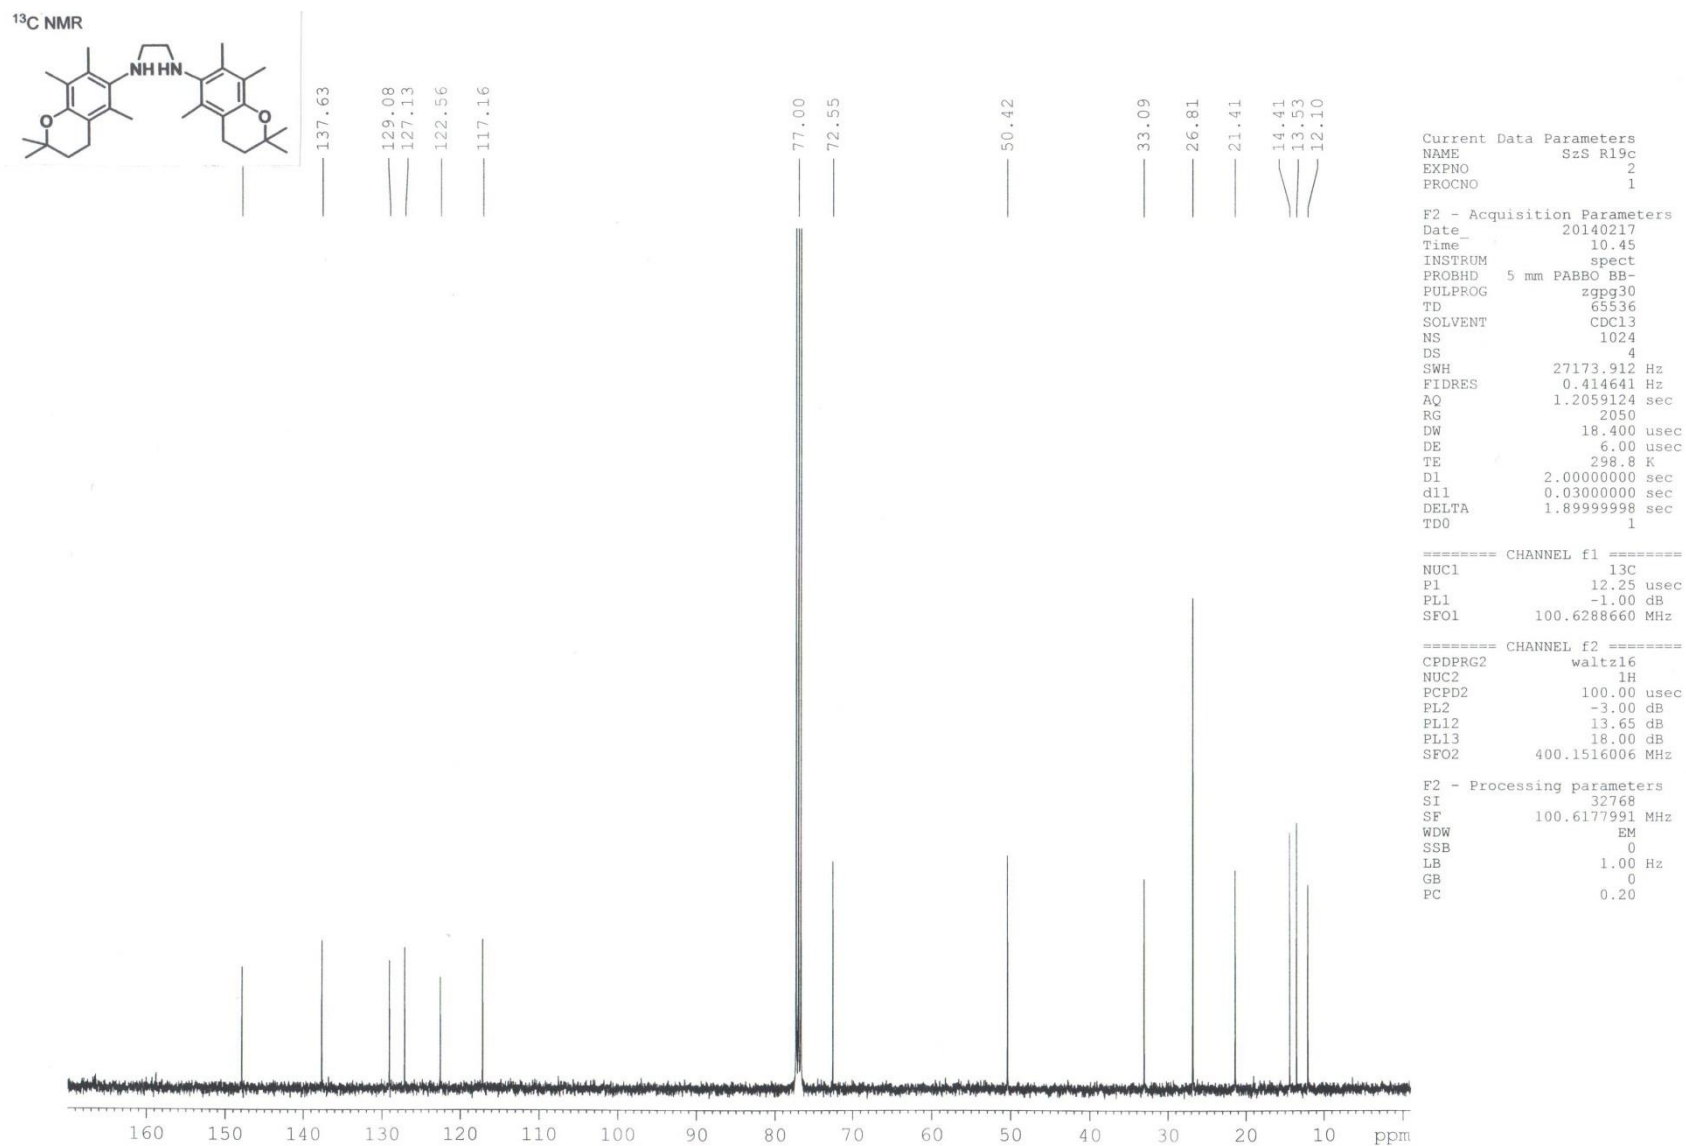

<sup>1</sup>H NMR spectrum of 1,3-bis(2,2,5,7,8-pentamethylchroman-6-yl)-4,5-dihydro-1H-imidazol-3-ium chloride (**14**)

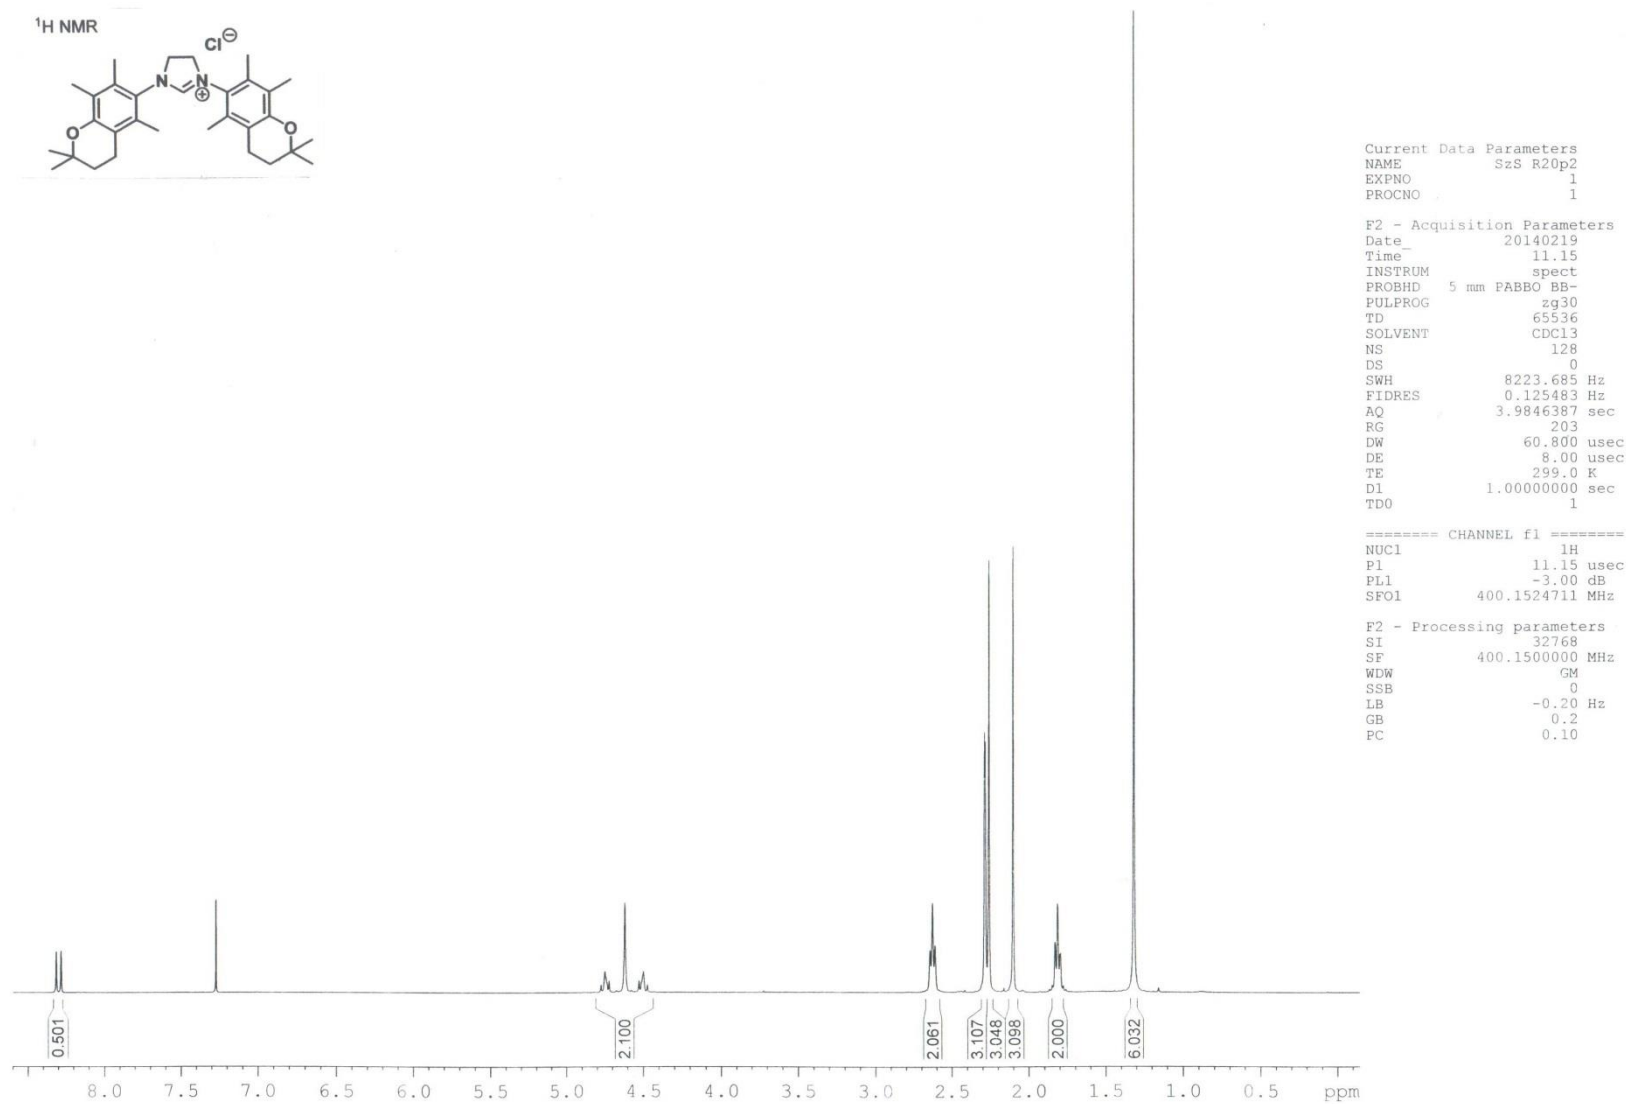

<sup>13</sup>C NMR spectrum of 1,3-bis(2,2,5,7,8-pentamethylchroman-6-yl)-4,5-dihydro-1H-imidazol-3-ium chloride (**14**)

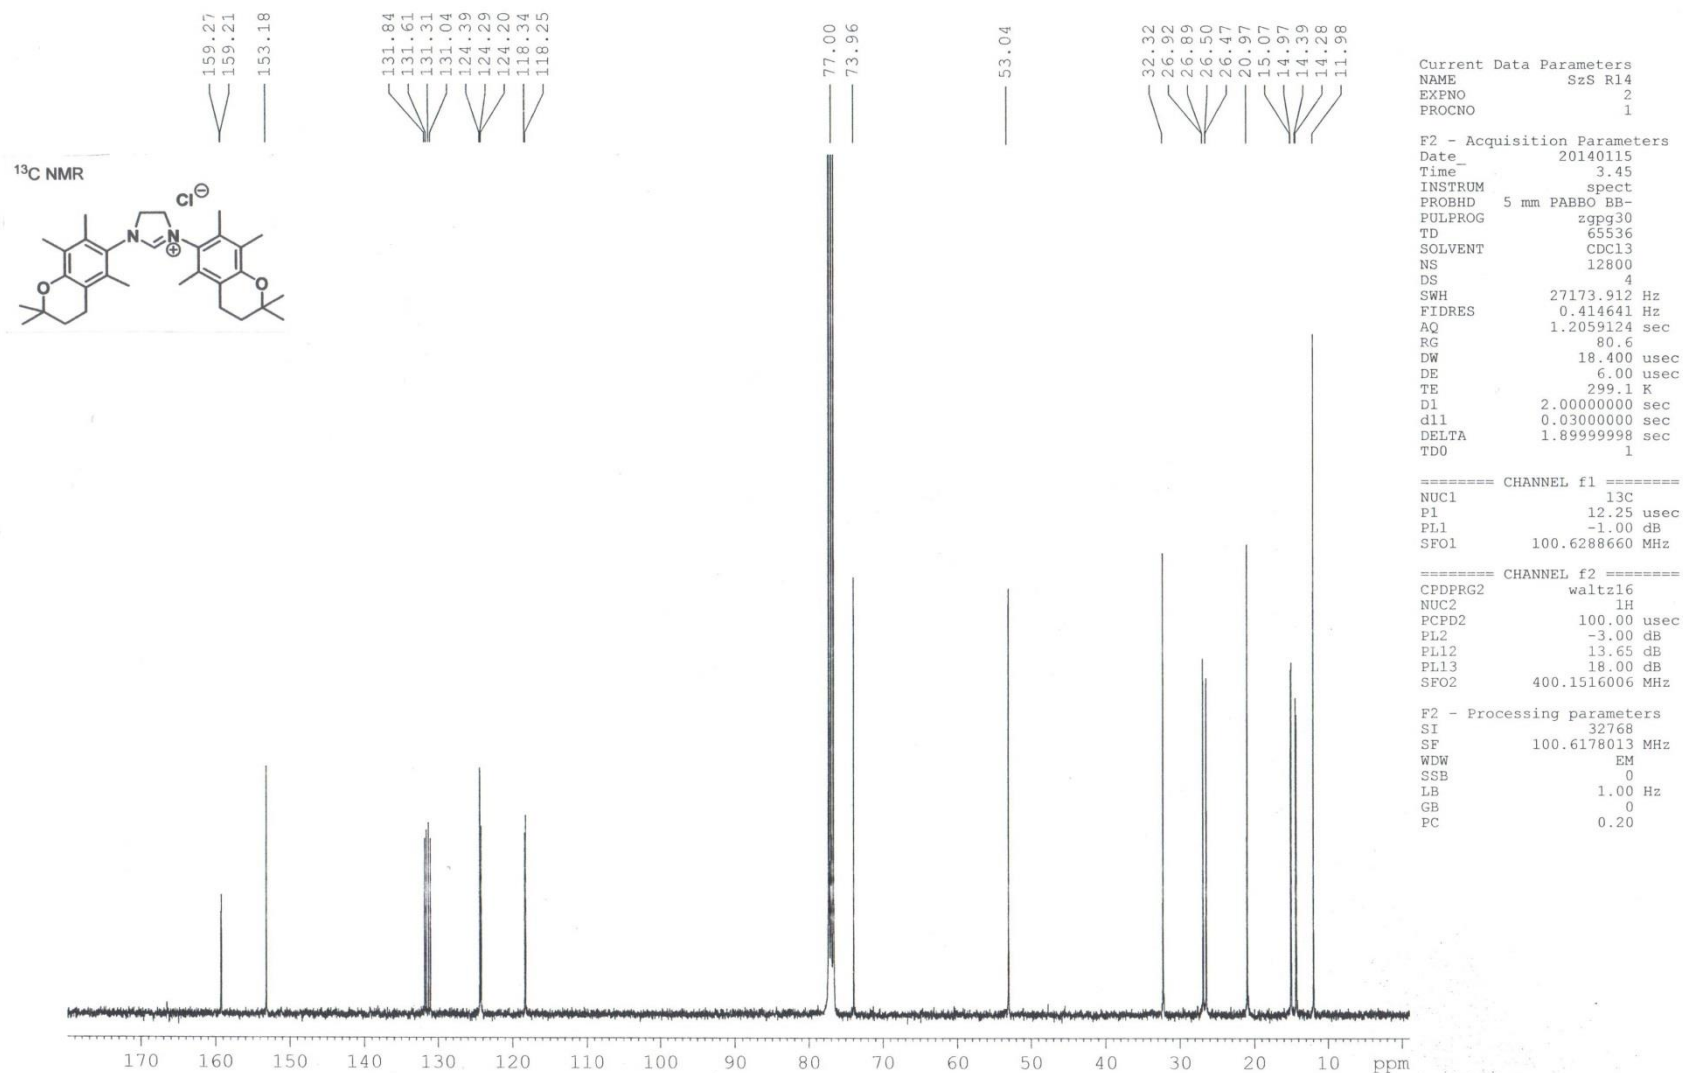

# HSQC spectrum of 1,3-bis(2,2,5,7,8-pentamethylchroman-6-yl)-4,5-dihydro-1H-imidazol-3-ium chloride (**14**)

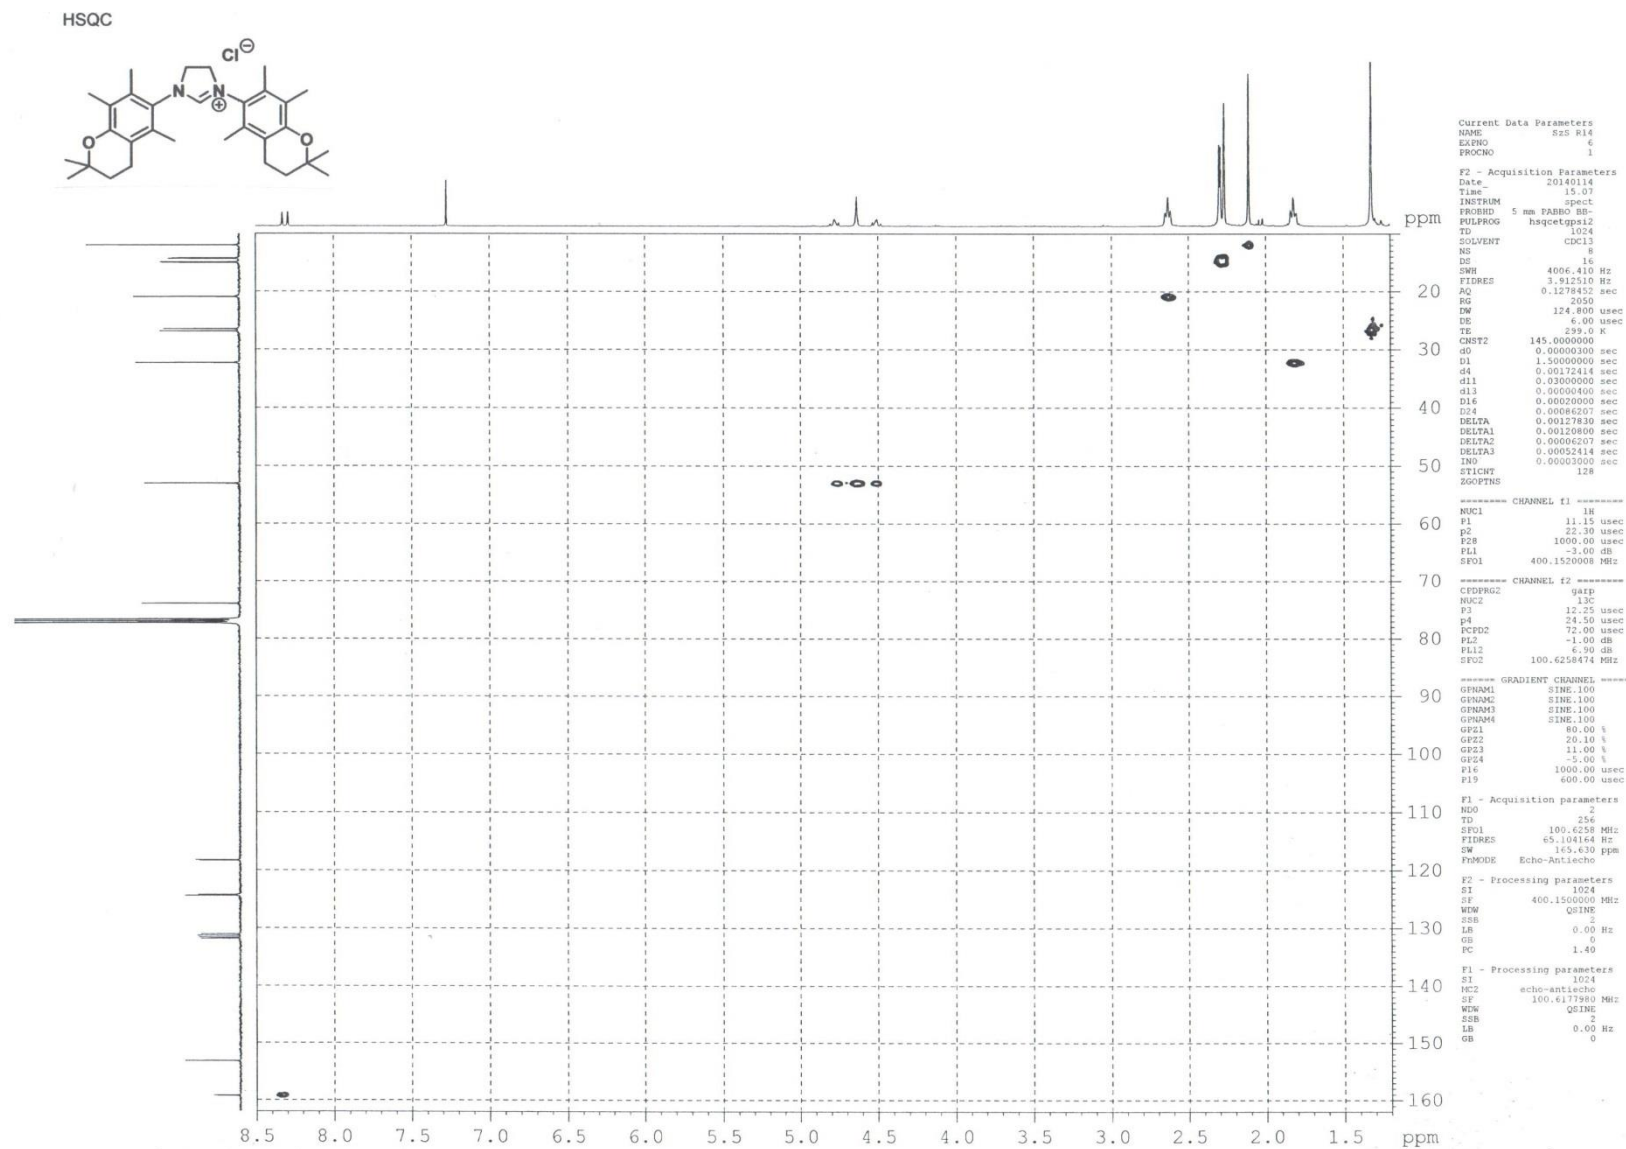

# <sup>1</sup>H NMR spectrum of the catalyst **9**

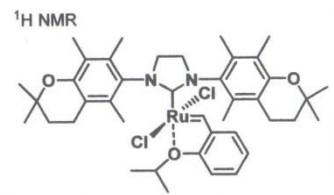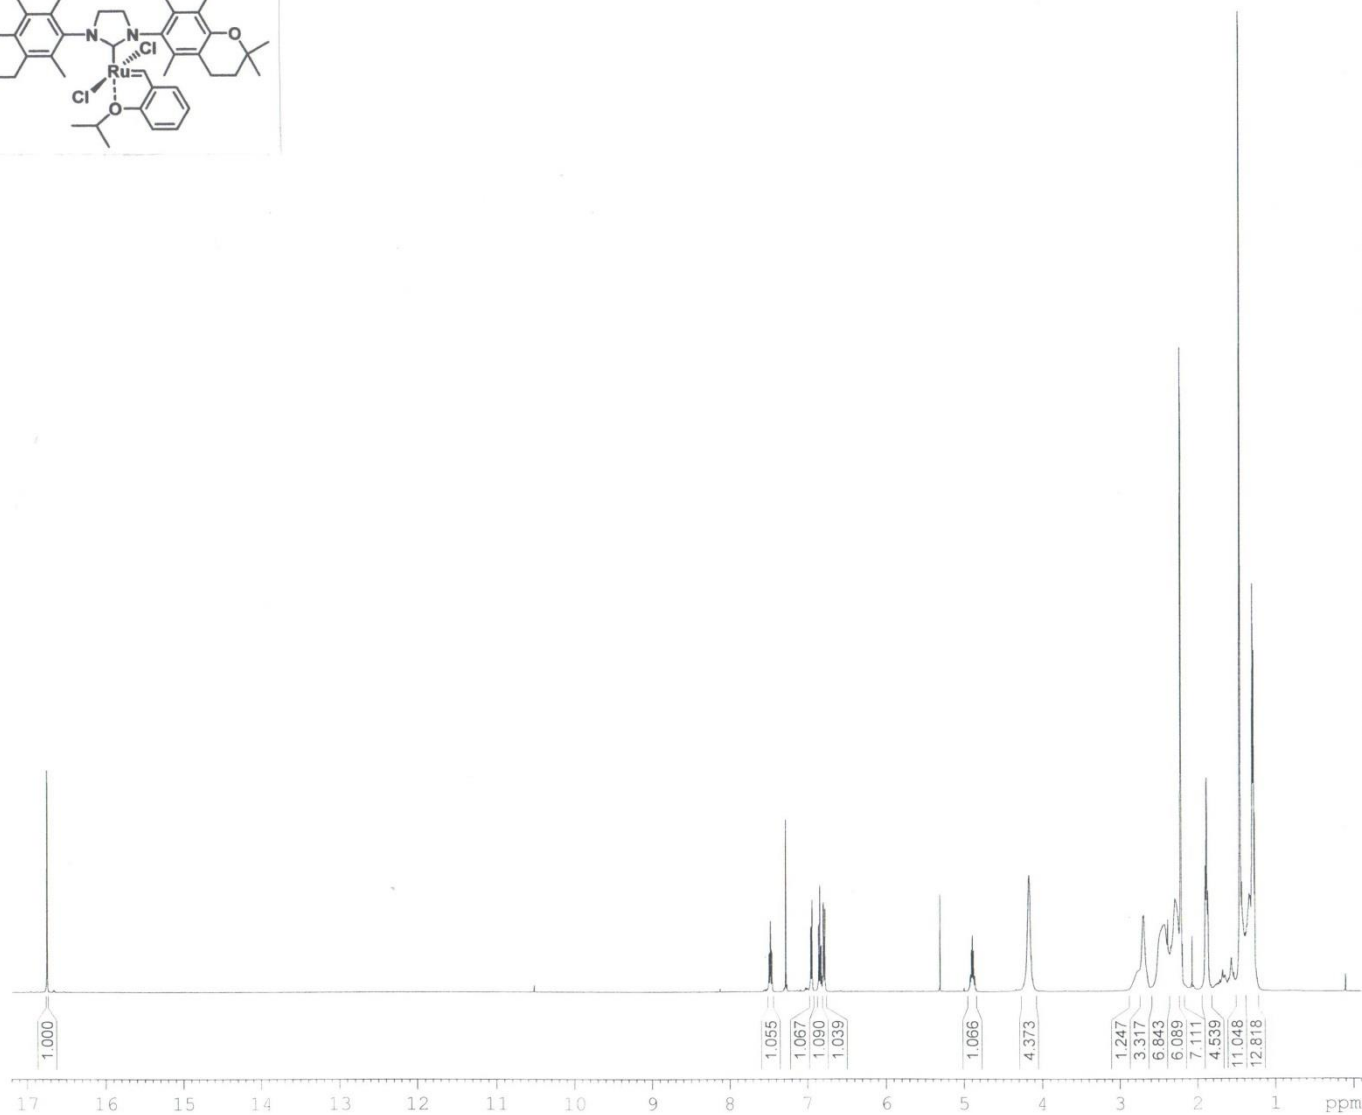

```

Current Data Parameters
NAME      AH R800
EXPNO     1
PROCNO    1

F2 - Acquisition Parameters
Date_     20141113
Time      16.06
INSTRUM   spect
PROBHD    5 mm PABBO BB-
PULPROG   zg30
TD        65536
SOLVENT   CDCl3
NS        64
DS        0
SWH       8223.685 Hz
FIDRES    0.125483 Hz
AQ        3.9846387 sec
RG        90.5
DW        60.800 usec
DE        8.00 usec
TE        299.1 K
D1        1.00000000 sec
TD0       1

===== CHANNEL f1 =====
NUC1      1H
P1        11.15 usec
PL1       -3.00 dB
SFO1      400.1538014 MHz

F2 - Processing parameters
SI        32768
SF        400.1500000 MHz
WDW       GM
SSB       0
LB        -0.20 Hz
GB        0.2
PC        1.00
    
```

<sup>13</sup>C NMR spectrum of the catalyst **9**

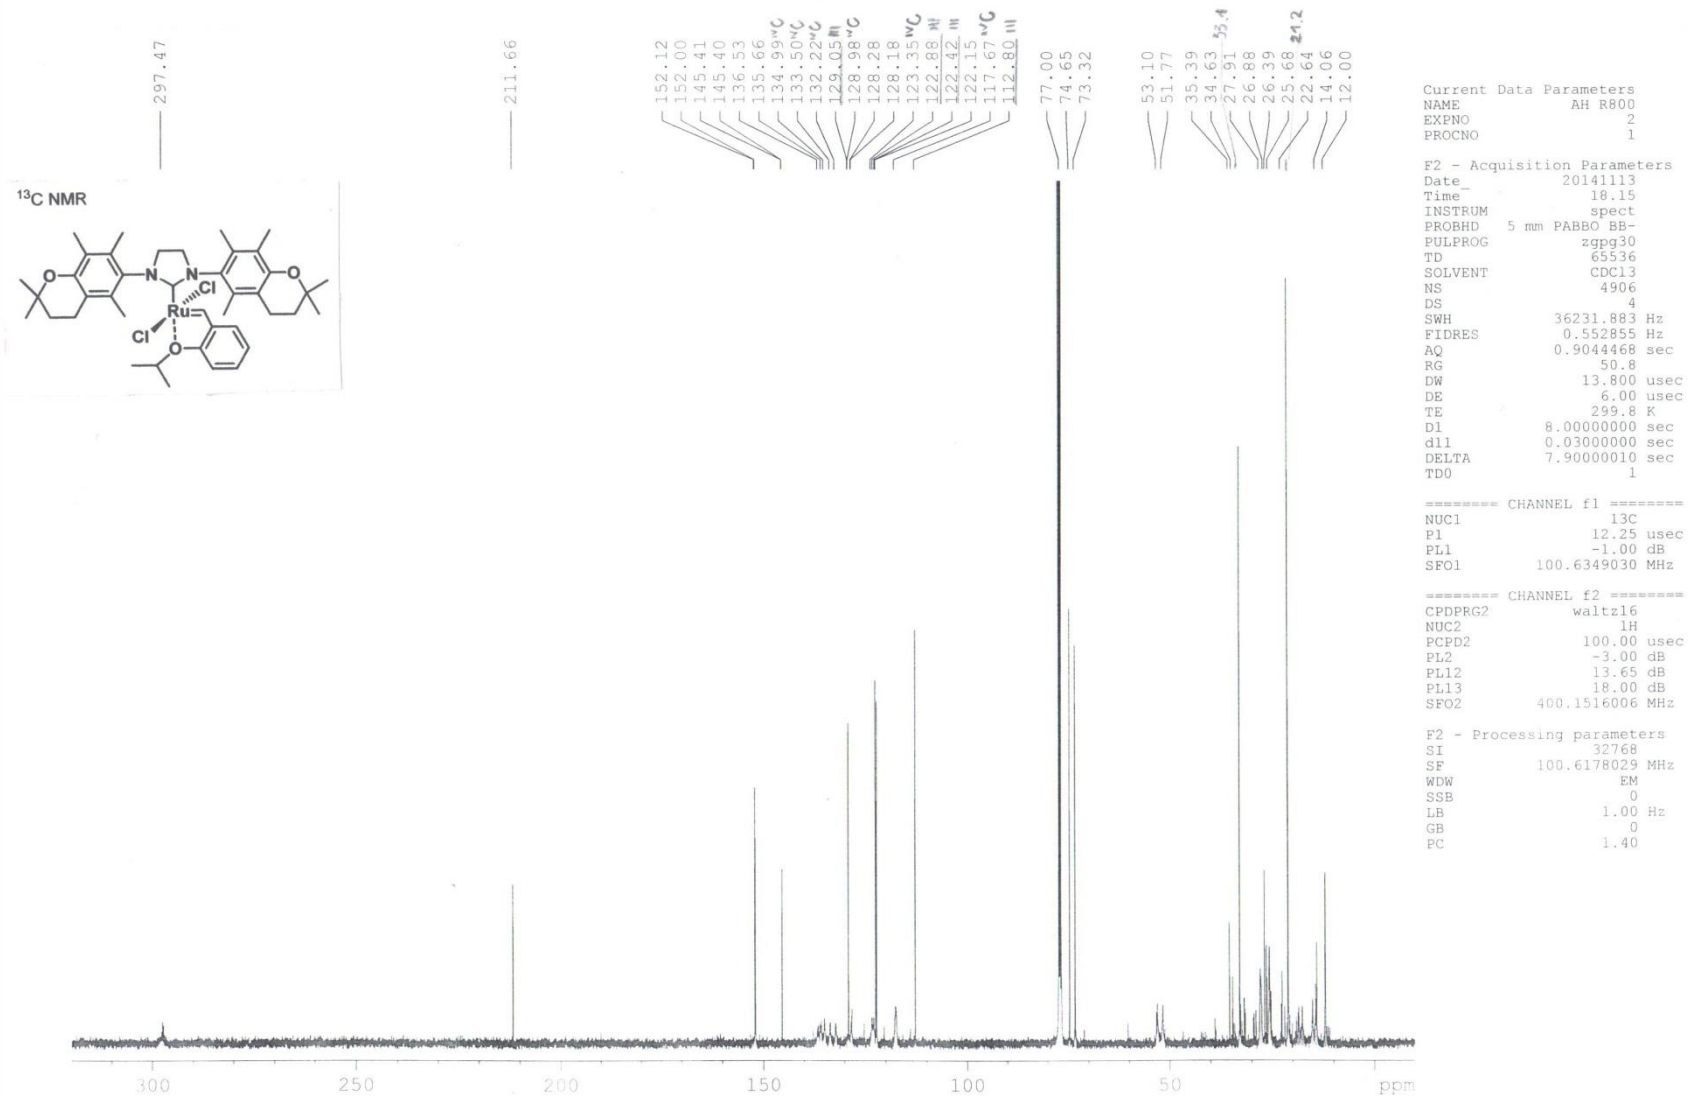



# HSQC spectrum of the catalyst **9**

HSQC

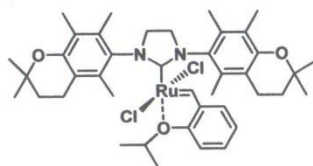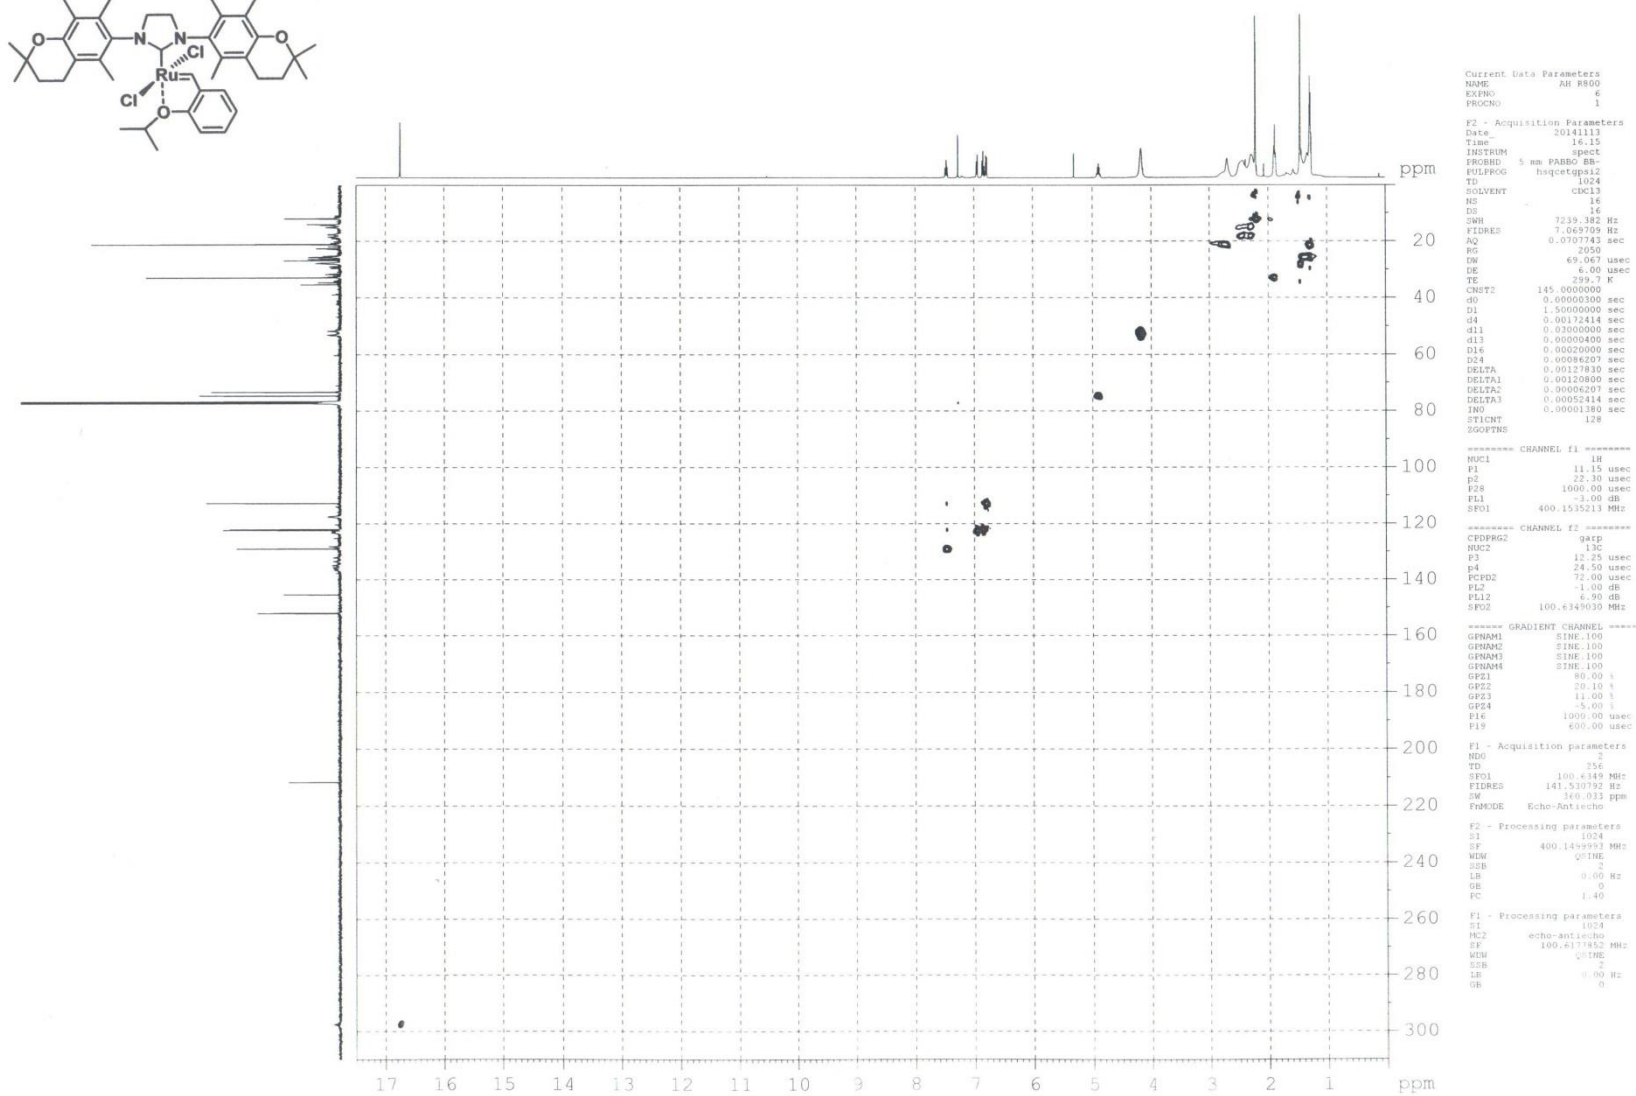

## HSQC spectrum of the catalyst **9**

HSQC range  $^{13}\text{C}$  to 130 ppm  $^1\text{H}$  to 7.5 ppm

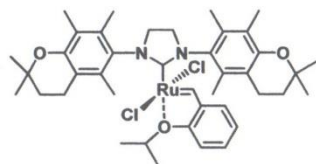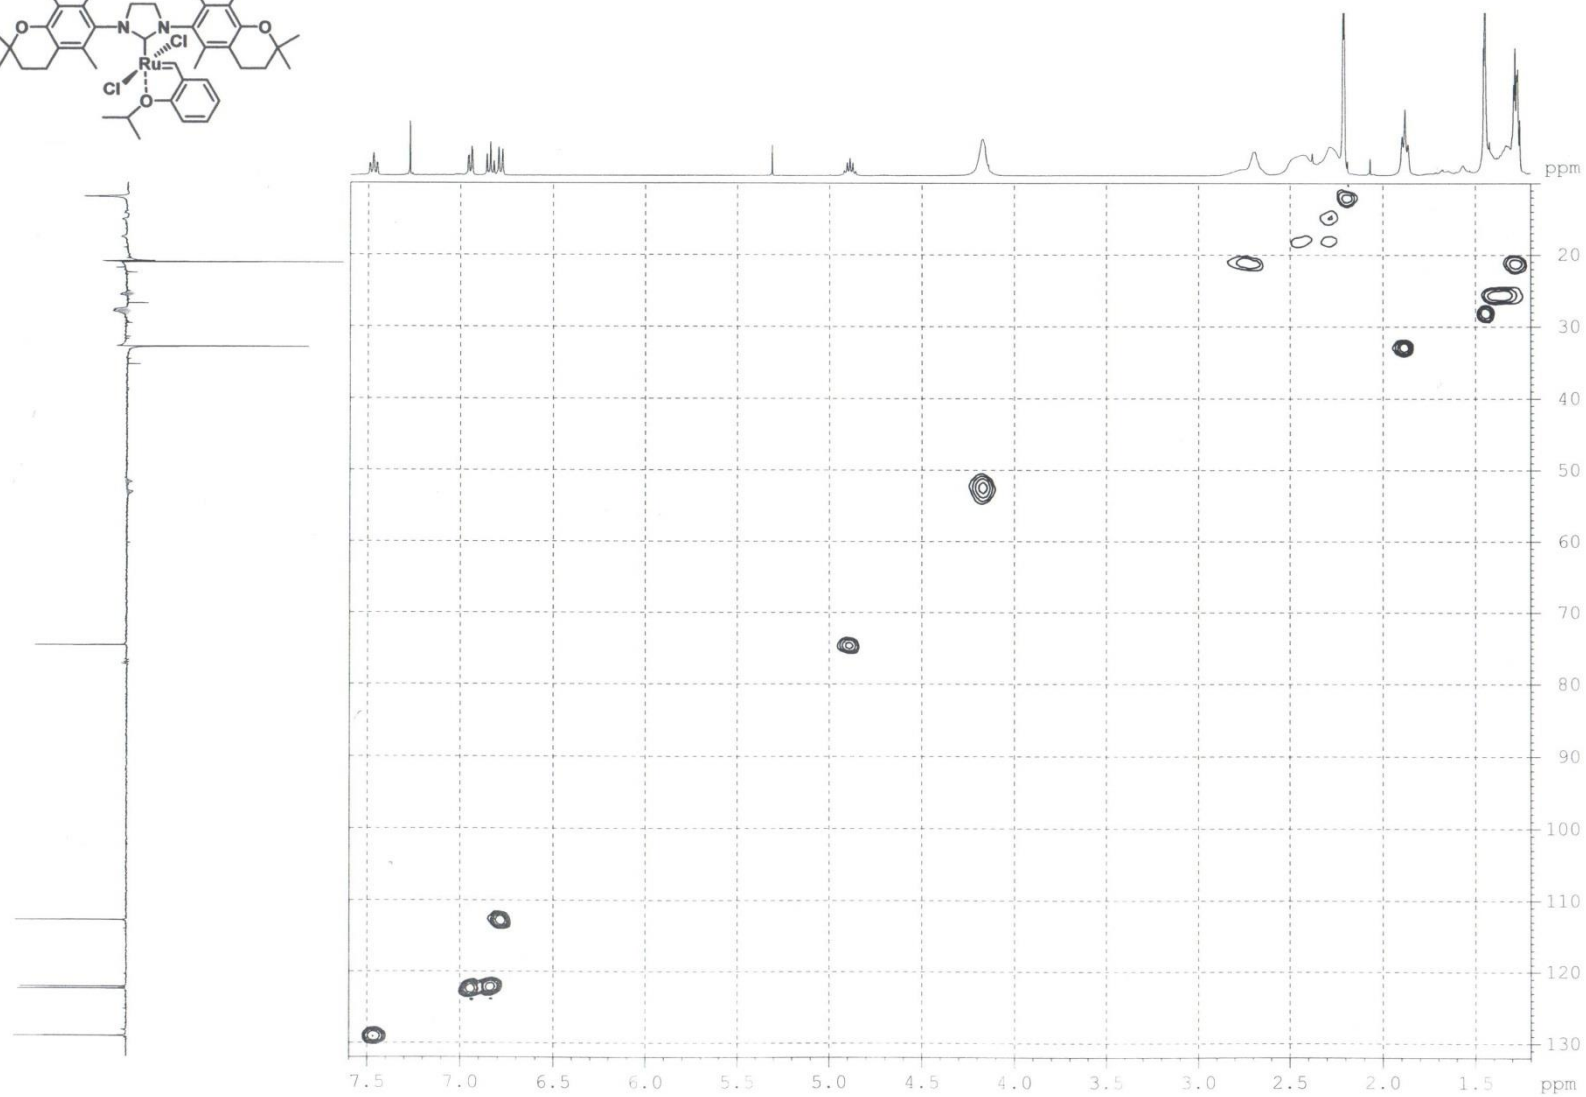

# <sup>1</sup>H NMR spectrum of the catalyst **9**

H NMR range 0-7.5 ppm T = 323K

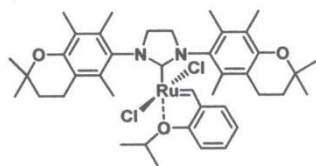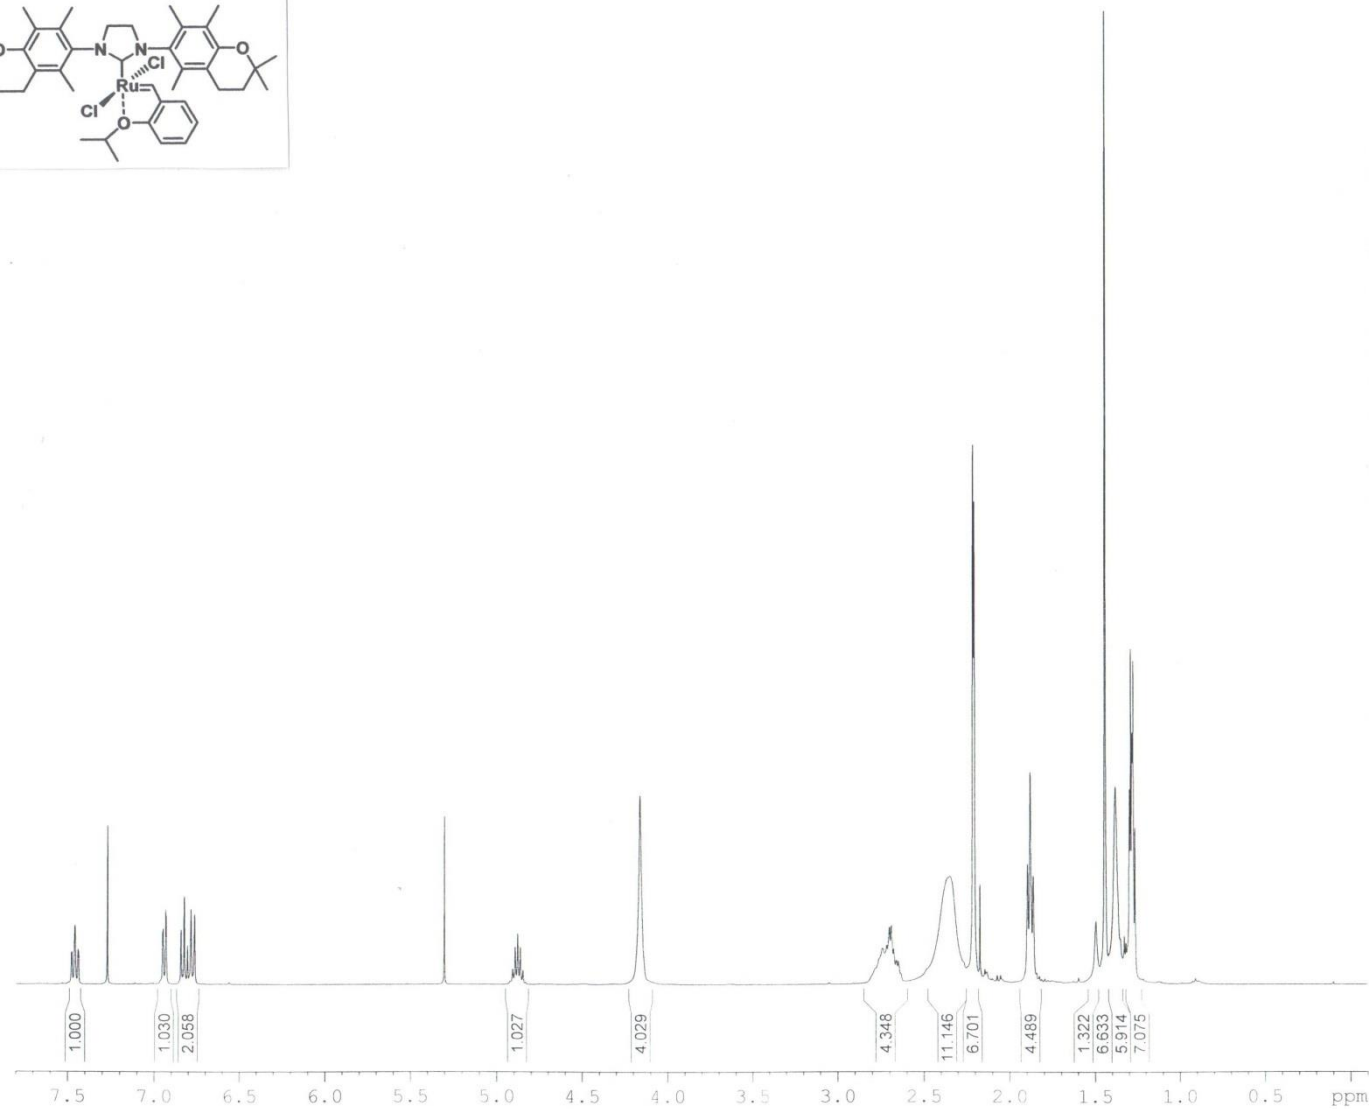

```
Current Data Parameters
NAME      AH R757
EXPNO     1
PROCNO    1

F2 - Acquisition Parameters
Date_     20141106
Time      13.36
INSTRUM   spect
PROBHD    5 mm PABBO BB-
PULPROG   zg30
TD        65536
SOLVENT   CDCl3
NS        128
DS        0
SWH       8223.685 Hz
FIDRES    0.125483 Hz
AQ        3.9846387 sec
RG        322
DW        60.800 usec
DE        8.00 usec
TE        323.0 K
D1        1.00000000 sec
TD0       1

===== CHANNEL f1 =====
NUC1      1H
P1        11.15 usec
PL1       -3.00 dB
SFO1      400.1524711 MHz

F2 - Processing parameters
SI        32768
SF        400.1500000 MHz
WDW       GM
SSB       0
LB        -0.20 Hz
GB        0.2
PC        1.00
```

$^{13}\text{C}$  NMR spectrum of the catalyst **9**

$^{13}\text{C}$  NMR range 0-220 ppm T = 323K

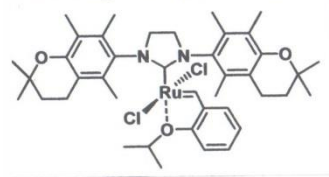

152.26  
152.14  
145.63

128.99  
122.39  
122.18  
117.69  
117.61  
112.85

77.00  
74.75  
73.38

33.12  
27.84  
25.89  
25.85  
21.26  
21.24  
21.18  
11.99

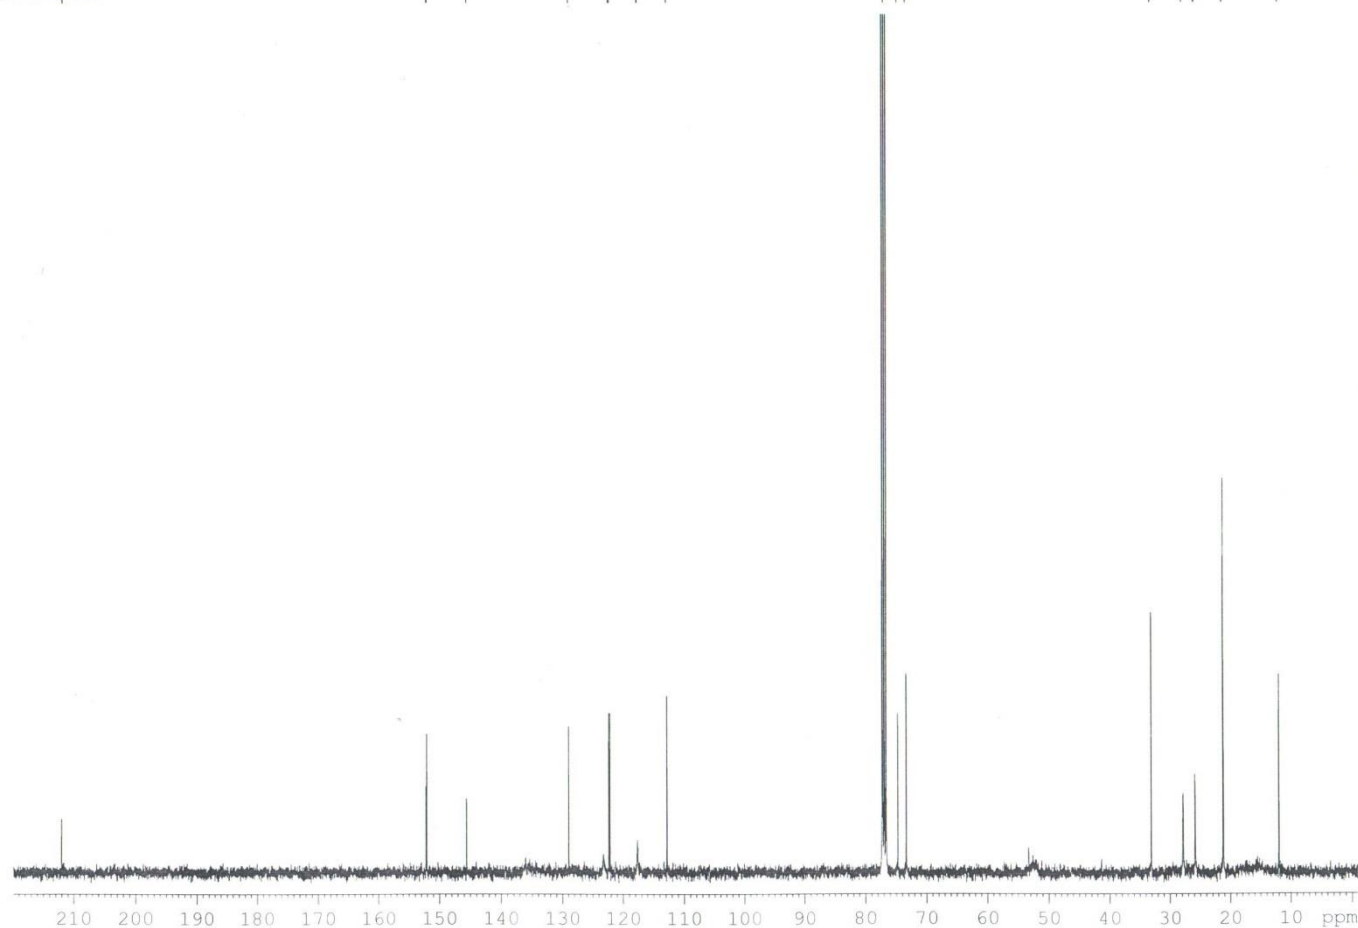

Current Data Parameters  
NAME AH R757  
EXPNO 2  
PROCNO 1

F2 - Acquisition Parameters  
Date\_ 20141106  
Time\_ 14.02  
INSTRUM spect  
PROBHD 5 mm PABBO BB-  
PULPROG zgpg30  
TD 65536  
SOLVENT CDCl3  
NS 1024  
DS 4  
SWH 36231.883 Hz  
FIDRES 0.552855 Hz  
AQ 0.9044468 sec  
RG 2050  
DW 13.800 usec  
DE 6.00 usec  
TE 323.0 K  
D1 2.00000000 sec  
d11 0.03000000 sec  
DELTA 1.89999998 sec  
TD0 1

===== CHANNEL f1 =====  
NUC1 13C  
P1 12.25 usec  
PL1 -1.00 dB  
SFO1 100.6338968 MHz

===== CHANNEL f2 =====  
CPDPRG2 waltz16  
NUC2 1H  
PCPD2 100.00 usec  
PL2 -3.00 dB  
PL12 13.65 dB  
PL13 18.00 dB  
SFO2 400.1516006 MHz

F2 - Processing parameters  
SI 32768  
SF 100.6177921 MHz  
WDW EM  
SSB 0  
LB 1.00 Hz  
GB 0  
PC 0.20

<sup>13</sup>C DEPT spectrum of the catalyst **9**

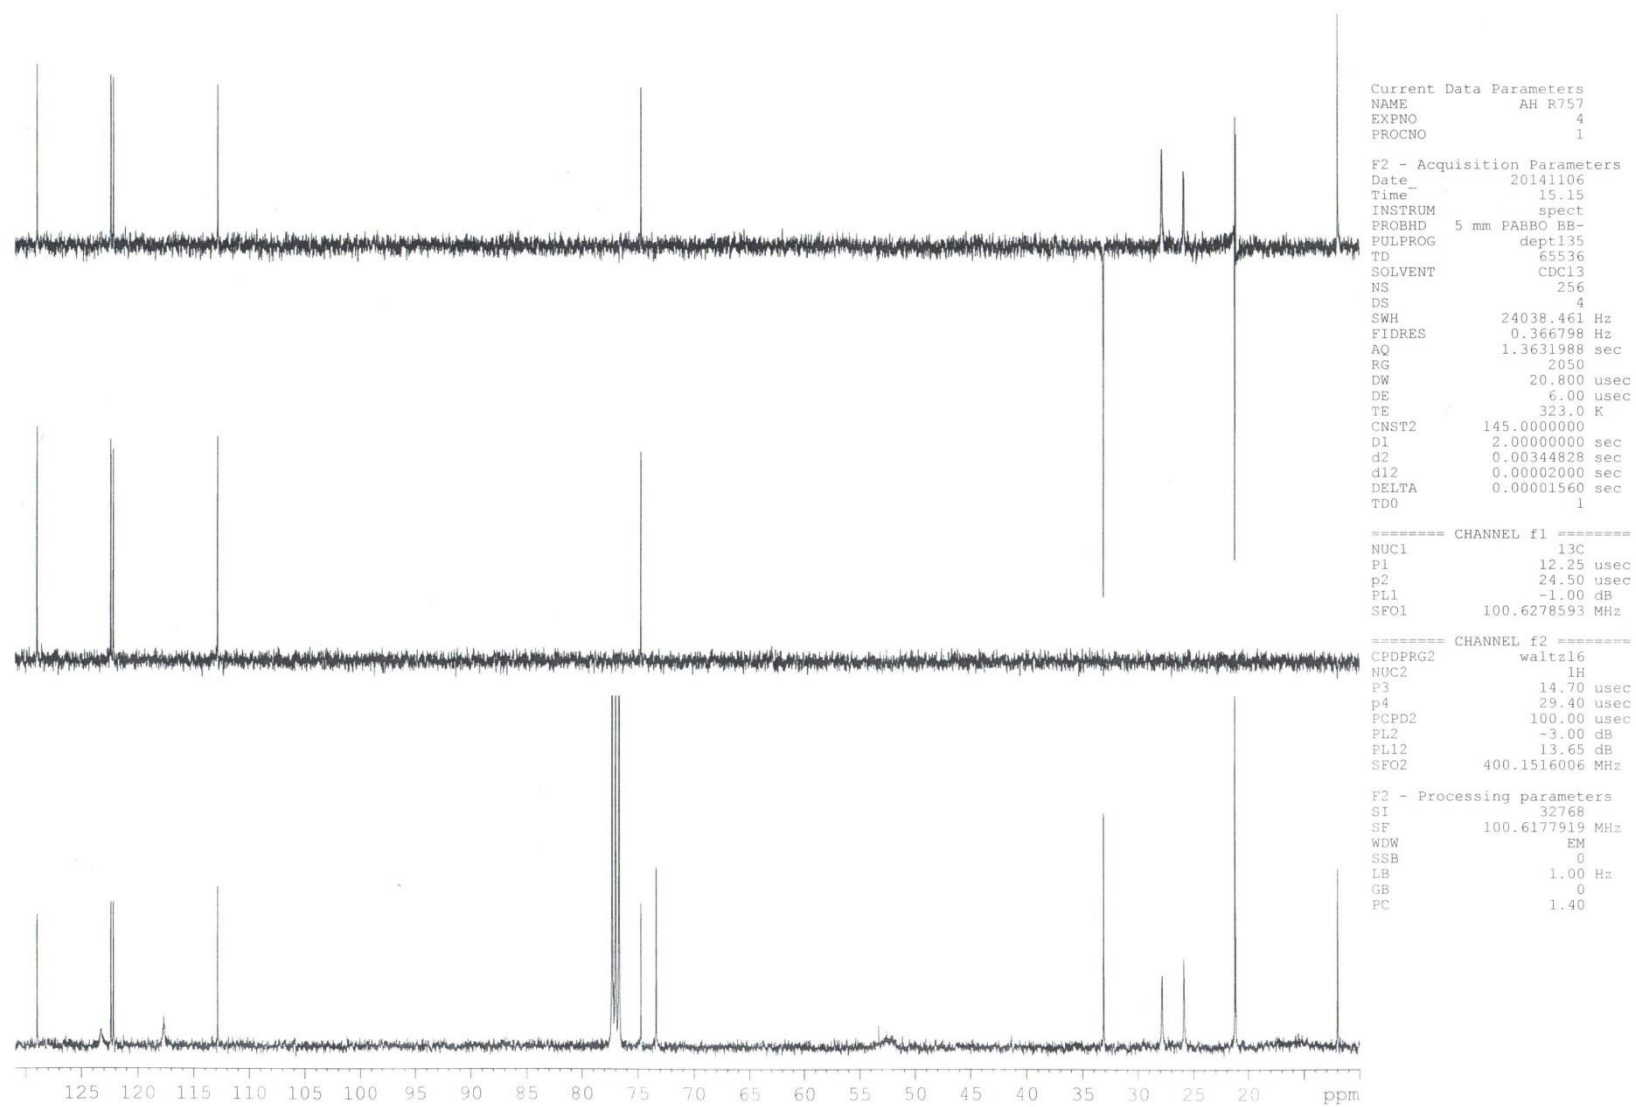

## References

1. Bower, J. F.; Race, N. I. *Org. Lett.* **2013**, *15*, 4616-4619.
2. Louie, J.; Bielawski, C. W.; Grubbs, R. H. *J. Am. Chem. Soc.* **2001**, *123*, 11312-11313.
3. Rivard, M.; Blechert, S. *Eur. J. Org. Chem.* **2003**, 2225-2228.
4. Hryniewicka, A.; Misztalewska, I.; Czajkowska-Szczykowska, D.; Urbańczyk-Lipkowska, Z.; Morzycki, J. W.; Witkowski, S. *Tetrahedron* **2014**, *70*, 6810-6816.
5. Taber, D. F.; Frankowski, K. J. *J. Org. Chem.* **2003**, *68*, 6047-6048.
6. Shekhter, O. V.; Sergovskaya, N. L.; Tsizin, Y. S.; Pridantseva, E. A. *J. Org. Chem. USSR (English Translation)* **1982**, *18*, 656-661.
7. Maj, J.; Morzycki, J. W.; Rárová, L.; Wasilewski, G.; Wojtkielewicz, A. *Tetrahedron Lett.* **2012**, *53*, 5430-5433.
8. Wenkert, E.; Bakuzis, M. L. F.; Buckwalter, B. L.; Woodgate, P. D. *Synth. Commun.* **1981**, *11*, 533-544.
9. Gardette, M.; Alexakis, A.; Normant, J. F. *Tetrahedron* **1985**, *41*, 5887-5900.
10. Bunce, R. A.; Bennett, M. J. *Synth. Commun.* **1993**, *23*, 1009-1020.
11. Wojtkielewicz, A.; Maj, J.; Morzycki, J. W. *Tetrahedron Lett.* **2009**, *50*, 4734-4737.
